1           **INFLUENZA A VIRUS RIBONUCLEOPROTEINS FORM LIQUID ORGANELLES AT**  
2                           **ENDOPLASMIC RETICULUM EXIT SITES**

3

4   Marta Alenquer<sup>1</sup>, Sílvia Vale-Costa<sup>1</sup>, Ana Laura Sousa<sup>1,2,§</sup>, Temitope Akhigbe Etibor<sup>1,§</sup>, Filipe  
5   Ferreira<sup>1</sup> and Maria João Amorim<sup>1,\*</sup>

6

7   <sup>1</sup> Cell Biology of Viral Infection Lab, Instituto Gulbenkian de Ciência, Oeiras, Portugal

8   <sup>2</sup> Electron Microscopy Facility, Instituto Gulbenkian de Ciência, Oeiras, Portugal

9

10   <sup>§</sup> Equal contribution

11   <sup>\*</sup>Corresponding author

12

13   Tel:           + 351 214407905

14   Fax:           + 351 214407970

15   Email         mjamorim@igc.gulbenkian.pt

16

17

18 **ABSTRACT**

19           Influenza A virus has an eight-partite RNA genome that during viral assembly forms a  
20 supramolecular complex containing one copy of each RNA. Genome assembly is a selective  
21 process driven by RNA-RNA interactions and is thought to lead to discrete punctate structures  
22 scattered through the cytosol. Here, we show that contrary to the accepted view, formation of  
23 these structures is not dependent on RNA-RNA interactions among distinct viral  
24 ribonucleoproteins (vRNPs), as they assemble in cells expressing only one vRNP type. We  
25 demonstrate that these viral inclusions display characteristics of liquid organelles, segregating  
26 from the cytosol without a delimitating membrane, dynamically exchanging material, deforming  
27 easily and adapting fast to hypotonic shock. We provide evidence that they develop close to the  
28 Endoplasmic Reticulum Exit Sites (ERES), being dependent on continuous ER-Golgi vesicular  
29 cycling. We show that viral inclusions do not promote escape to interferon response, and  
30 propose that they facilitate selected RNA-RNA interactions in a liquid environment of  
31 concentrated vRNPs.

32

33

34

35           **MAIN TEXT**

36           Influenza A infections are serious threats to human health causing annual epidemics and  
37 occasional pandemics<sup>1</sup>. The virus contains an eight-partite RNA genome, and each segment is  
38 encapsidated as an individual viral ribonucleoprotein (vRNP) complex. vRNPs are composed of  
39 single-stranded negative-sense RNA, with base paired terminal sequences originating a double  
40 stranded RNA portion where the trimeric RNA-dependent RNA polymerase (RdRp), composed  
41 of PB1, PB2 and PA, binds. The remaining sequence attaches several copies of unevenly-  
42 bound nucleoprotein (NP)<sup>2</sup>. The advantages of having a segmented genome are evident for  
43 viral evolution<sup>3</sup> and for better gene expression control<sup>4</sup>, but increase the complexity of the  
44 assembly of fully infectious virions<sup>5-8</sup>.

45           Viral assembly occurs at the plasma membrane and, in 80% of the cases, 8 distinct  
46 vRNPs are packaged selectively into a budding membrane<sup>9</sup>. Seminal work established the  
47 requirement of cis-acting and intersegment RNA-RNA interactions for the formation of this  
48 supra-molecular complex (reviewed in<sup>5-8</sup>). However, it is under debate if vRNPs reach the  
49 plasma membrane already as complete genome bundles.

50           Upon exiting the nucleus, where they replicate, vRNPs accumulate around the  
51 microtubule organizing centre<sup>10</sup> and, subsequently, distribute throughout the cytoplasm  
52 concentrating in discrete puncta that enlarge as infection progresses<sup>10-14</sup>. Each puncta  
53 accommodates different vRNP segments with the diversity in vRNPs increasing proportionally to  
54 the proximity of the plasma membrane<sup>11,13</sup>. Such observation led to the proposal that genome  
55 assembly preceded vRNP packaging in budding virions by a process intimately linked with the  
56 formation of the referred vRNP hotspots<sup>6,11,13-15</sup>. Studies on the biogenesis of vRNP hotspots  
57 showed that their formation requires the cellular GTPase Rab11<sup>10,12,16,17</sup>. In uninfected cells,  
58 Rab11 is the master regulator of the endocytic recycling compartment (ERC), one of the  
59 systems the cell uses for delivering endocytosed material, as well as specific cargo from the  
60 *trans-Golgi-Network* (TGN), to the cell surface<sup>18</sup>. The process is very well-described for

61 uninfected cells, with Rab11-GTP regulating ERC transport by recruiting molecular motors,  
62 tethers and SNARES to respectively drive, dock and fuse vesicles to the plasma membrane<sup>18</sup>.  
63 Despite initial reports that the functional role of Rab11 was to deliver vRNPs to the cell  
64 surface<sup>10,12,17,19</sup>, accumulating evidence analyzing Rab11 sub-cellular localization and non-  
65 abundancy in virions<sup>14,16,20</sup>, binding partners<sup>14</sup> and host transferrin recycling<sup>14,21</sup> strongly  
66 indicates that Rab11 is redirected and its function is impaired during IAV infection. In fact, it was  
67 demonstrated that vRNPs outcompeted Rab11 effectors for Rab11 binding, rendering the  
68 recycling process sub-optimal<sup>14</sup>. Further corroborating the scenario that Rab11 pathway is  
69 impaired with infection, a recent publication showed that Rab11 was re-routed to the ER during  
70 IAV infection<sup>16</sup>. In addition, using correlative light and electron microscopy, vRNP hotspots were  
71 shown to concentrate clustered vesicles positive for Rab11, surrounded by electron dense  
72 material<sup>14</sup>.

73         The formation of vRNP hotspots was postulated to be dependent on the establishment  
74 of sequential RNA-RNA interactions occurring as Rab11 vesicles transporting vRNPs  
75 collided<sup>6,11,13,22,23</sup>. However, the impaired ERC hypothesis above mentioned, argues against the  
76 requirement for RNA-RNA interactions in the formation of vRNP hotspots and challenges the  
77 IAV assembly model proposed. Nevertheless, the existence of vRNP/Rab11 hotspots indicates  
78 segregation from the cytosol in foci that are not delimited by membranes, although they  
79 contain numerous remodeled membranes inside<sup>14,15</sup>. Sub-organelles not delimited by  
80 membranes are abundant in the viral world and are known as viroplasms, viral factories,  
81 aggresomes or virosomes, to indicate sites of viral replication<sup>24-26</sup>. Viruses can also form viral  
82 inclusions and these are sites of accumulation of viral proteins, nucleic acid and selected host  
83 proteins and can include viral factories or not<sup>24,25</sup>. Given this definition, IAV vRNP hotspots could  
84 be re-classified as viral inclusions. The most notable cases of electron dense aggregated  
85 material in the cytosol (not delimited by membranes) are found in cells infected by viruses of  
86 DNA (*Poxviridae*, *Iridoviridae*, *Asfaviridae*), of dsRNA (*Reoviridae*) and of negative-sense RNA

87 genome (*Paramyxoviridae*, *Rhabdoviridae*, *Filoviridae*)<sup>24-29</sup>. Formation of factories is associated  
88 with remodeling of host membranes and/or cytoskeleton to orchestrate sophisticated platforms  
89 for viral replication and/or for escaping host immune recognition<sup>26</sup>. However, several questions  
90 remain unclear relative to the internal organization and biophysical properties of these cellular  
91 condensates. Resolving these questions for IAV will help to understand the rules and physical  
92 properties of organizing cellular matter into membraneless organelles in the virus world and  
93 identify their functions.

94         In this manuscript, we show that vRNP/Rab11 hotspots constitute viral inclusions that  
95 are not delimited by membranes and display characteristics of liquid organelles. Liquid  
96 properties include dynamic change of components, round appearance, easy deformation upon  
97 application of sheer force or fusion events and fast adaptation to physiological changes. We  
98 show that the liquid organelles are formed in the vicinity of the Endoplasmic Reticulum Exit Sites  
99 (ERES) (or transitional ER) and their assembly is dependent on continuous ER-Golgi vesicular  
100 cycling. We demonstrate that, contrary to the current view, these sites are not formed by  
101 established RNA-RNA interactions amongst different vRNP segments, but precede viral  
102 genome assembly. We propose that the condensed IAV inclusions do not promote escape to  
103 the antiviral response but facilitate stochastic RNA-RNA interactions in a liquid environment of  
104 crowded vRNPs.

105

106

107 **Results**

108 **vRNPs and Rab11 form rounded viral inclusions that are not membrane delimited.**

109 Using electron microscopy, we previously showed that viral infection induced clustering  
110 of vesicles heterogeneous in size<sup>14</sup>. These constitute, in high percentage, round-shaped  
111 molecular concentrates, enriched in membranes at the core, but interestingly not delimited  
112 from the cytosol by membranes (Fig. 1a, yellow arrows and quantification in Supplementary Fig.  
113 1). Such structures are found in cells infected by many viruses and known as viral inclusions, as  
114 they concentrate viral (and cellular) material<sup>24,25</sup>. In agreement, using correlative light and  
115 electron microscopy, areas of clustered vesicles/viral inclusions matched those of vRNPs and  
116 Rab11 identified by immunofluorescence<sup>14</sup>. Using double immunogold labelling, we confirmed  
117 the existence of electron dense regions (green arrowheads) positive for vRNPs, protruding from  
118 vesicles (red arrowheads) positive for Rab11 (Fig. 1b). To investigate whether the lack of  
119 membrane enabled viral inclusions to react fast to physiological changes or whether they  
120 constituted crystallized aggregated material, we subjected them to hypotonic shock. Infected  
121 cells expressing GFP-NP to label vRNPs<sup>30</sup> were live-imaged by confocal microscopy. After  
122 approximately 1 min, cells were subjected to a rapid hypotonic shock (the ionic strength  
123 changed from 150 to 0.300 mM by diluting media with water). Viral inclusions, otherwise stable  
124 over time, immediately started to dissolve, and 2 min later were no longer visible (Fig. 1c,  
125 Supplementary Movies 1 and 2). The ability of the IAV viral inclusions to react to dilution  
126 suggests a liquid character<sup>31</sup>. Together, these data reveal that viral inclusions, containing both  
127 Rab11 and vRNPs, can respond to changes in the cellular environment and their constituents  
128 can self-organize into fluxional spherical structures in live cells, behaving like a membraneless  
129 organelle.

130



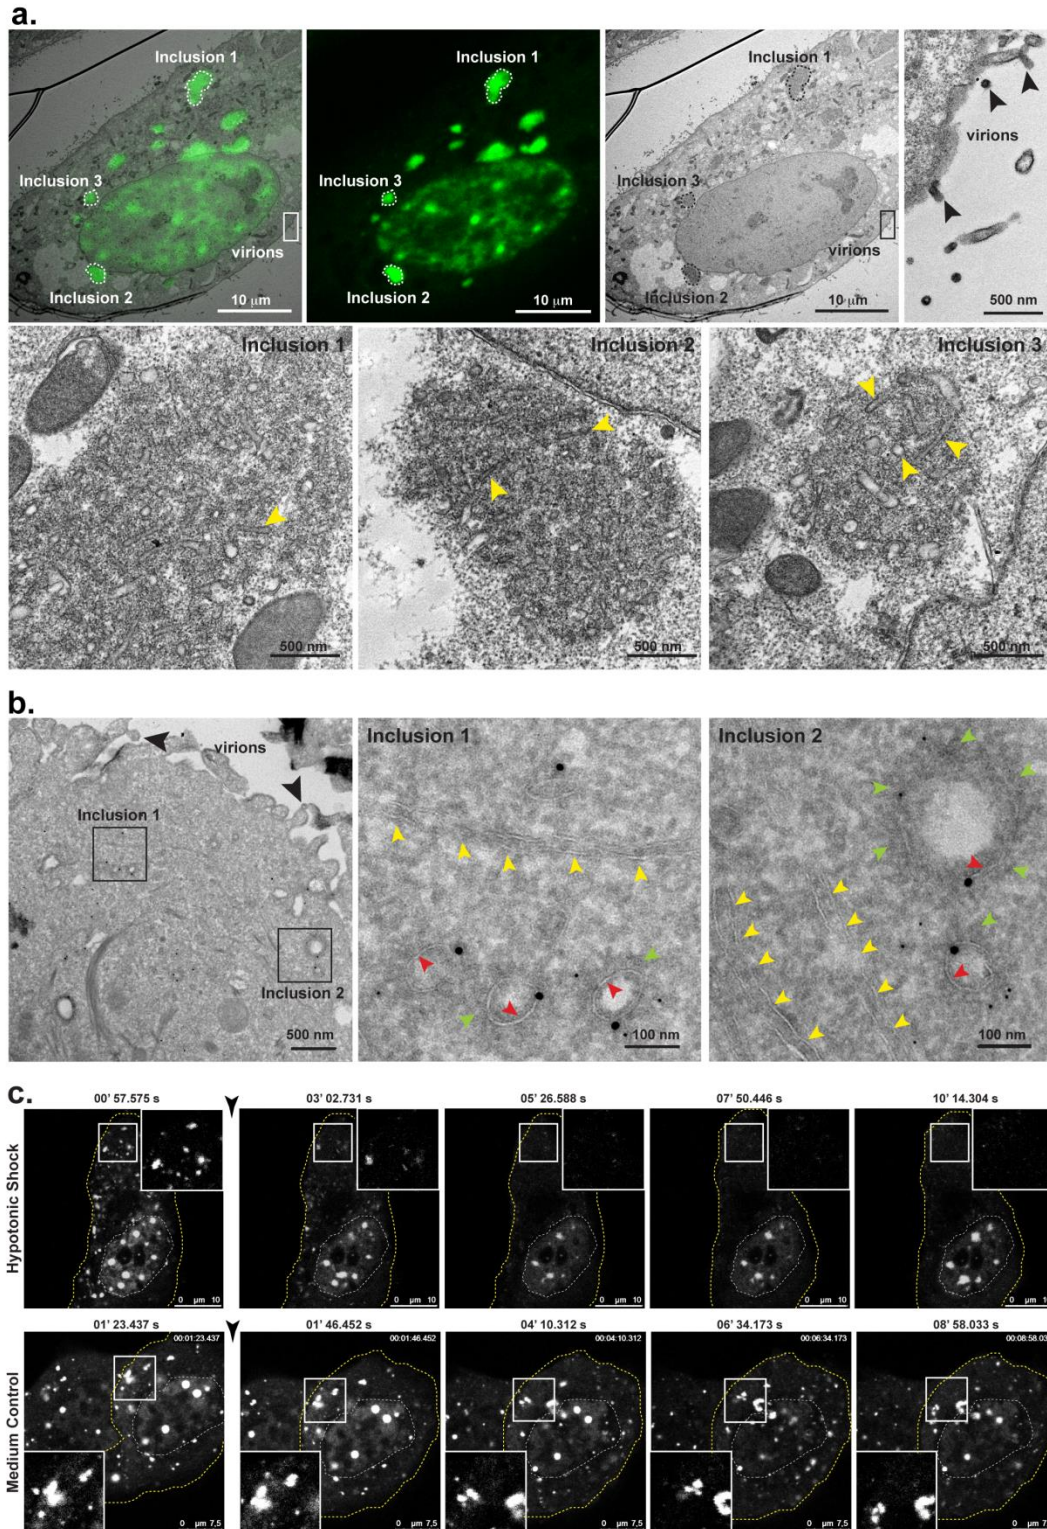

Figure 1. vRNPs and Rab11 form membraneless organelles that quickly respond to changes in the cellular environment

134 **a.** HeLa cells were transfected with a plasmid encoding GFP-NP and co-infected with PR8 virus, at an MOI of 10.  
135 Cells were imaged by confocal and electron microscopy and the resultant images were superimposed. Areas of  
136 correlation, inclusions 1 to 3, are delineated by a dashed line in the upper panel and shown in greater detail in the  
137 lower panel. Progeny virions budding at the surface (black arrowheads) show that the cell was infected. Yellow  
138 arrowheads show individual vesicles within the inclusion. Bar = 10  $\mu\text{m}$  or 500 nm. **b.** GFP-Rab11 WT cells were  
139 infected with PR8 virus, at an MOI of 5, for 16 h. Cells were stained for GFP (18 nm gold particles) and viral NP (6 nm  
140 gold particles). Inclusion areas are highlighted by black boxes. Yellow arrowheads indicate ER structures in the  
141 vicinity of viral inclusions. Black arrowheads show progeny virions budding at the cell surface. Red arrowheads show  
142 Rab11 vesicles. Green arrowheads show electron-dense vRNPs. Bar = 100 or 500 nm. **c.** A549 cells were  
143 transfected with a plasmid encoding GFP-NP and co-infected with PR8 virus, at an MOI of 5. At 16 hpi, cells were  
144 imaged under time-lapse conditions. The black arrowhead indicates addition of water (hypotonic shock) or regular  
145 growth medium. White boxes highlight vesicular clusters in the cytoplasm in the individual frames. The dashed white  
146 line marks the cell nucleus, whereas the dashed yellow line delineates the cell periphery. Bar = 7.5 or 10  $\mu\text{m}$ . Images  
147 were extracted from Supplementary Movies 1 and 2. Experiments were performed at least twice.

148

### 149 **vRNPs form viral inclusions with properties of liquid organelles.**

150 Many membraneless organelles have been described in the cell, being supramolecular  
151 assemblies formed by nucleic acids and proteins<sup>32</sup>. Examples include nuclear speckles,  
152 nucleolus, centrioles and stress granules<sup>33,34</sup>. Interestingly, these were shown to have liquid-like  
153 properties on account of their dynamic exchange of material, ability to internally reorganize,  
154 rounded shape, and deformability promoted by fusion and fission events<sup>32,35</sup>. Recently, Negri  
155 bodies formed during rabies virus infection were shown to have liquid-like properties<sup>27</sup>, and it  
156 was postulated that other viral factories or viral inclusions among *Mononegavirales* would  
157 assemble by liquid-liquid phase separation. To test this idea for influenza A viral inclusions, we  
158 analysed their dynamic nature inside living cells. We observed that viral inclusions were highly  
159 dynamic, as demonstrated in Fig. 2a (and Supplementary Movie 3). To capture the movement  
160 of a 1 min movie in a snapshot, we show the average intensity of labelled vRNPs (in red) as a  
161 defined puncta, surrounded by a wider green area that corresponds to the standard deviation of



162 the average, indicating that these structures are highly dynamic (Supplementary Movie 3). We  
163 then enquired if individual clusters exchanged material with the exterior and performed  
164 fluorescence recovery after photobleaching (FRAP). We found a high variation in the behavior  
165 of cytosolic viral inclusions, with different speeds and patterns of recovery of the fluorescent  
166 signal. Some exhibited a fast and complete recovery (Fig. 2b, purple line, Supplementary Movie  
167 3), whilst others showed a slower and incomplete recovery (Fig. 2b, blue line, Supplementary  
168 Movie 3). The recovery profile was also variable with some regions losing and/or gaining  
169 intensity during the recovery phase (Fig. 2b, purple line) but others exhibiting a steady  
170 progression of fluorescence recovery (Fig. 2b, blue line). Not surprisingly, when the collection of  
171 FRAP events was averaged, the recovery profile obtained had a very large standard deviation  
172 (Fig. 2c). The calculated half time of recovery was 2.9 seconds and the diffusion rate calculated  
173 was  $2.422 \pm 0.154 \text{ m}^{-13} \text{ s}^{-1}$  ( $D \pm \text{SEM}$ ), a value similar to what has been found for other liquid  
174 organelles including Negri bodies formed during rabies virus infection<sup>27</sup>. These measurements  
175 are also consistent with those of nucleoli and stress granules<sup>27,36</sup>, indicating that viral inclusions  
176 exchange material with similar structures or with the cytosol. The mobile fraction of vRNPs  
177 varied from  $41.4 \pm 15.7\%$  (mean  $\pm$  SD) at 5 seconds to  $63.5 \pm 39.7\%$  within 60 seconds, and the  
178 curve plateaued after 15 seconds (Fig. 2c). The immobile GFP-NP must be biologically relevant.  
179 It either translates thermodynamically stabilized or kinetically trapped state of the protein, as in  
180 stable interactions (presumably among different vRNPs in each cluster), or a complex pattern of  
181 exchange between vRNPs and the exterior. In fact, careful analysis of dynamic events of  
182 individual viral inclusions revealed a constant flux of small material in and out of these rounded  
183 structures (Fig. 2d, arrows, Supplementary Movie 4), many fusion events amongst individual  
184 inclusions either separated at short or long distance (Fig. 2e, Supplementary Movies 5 and 6)  
185 and fission events (Fig 2f, Supplementary Movie 6). Upon fusion/fission events, the rounded  
186 shape was reacquired, indicating occurrence of internal rearrangements. Some acquisition of  
187 material originated from several compartments being difficult to track their origin (Fig. 2e,

188 complex, Supplementary Movie 6). Collectively, these data suggest that vRNP/Rab11 inclusions  
 189 are liquid droplets arising from phase separation. Furthermore, these inclusions appear to be  
 190 constantly exchanging material amongst them, which would be essential if these were sites  
 191 devoted to viral genome assembly.

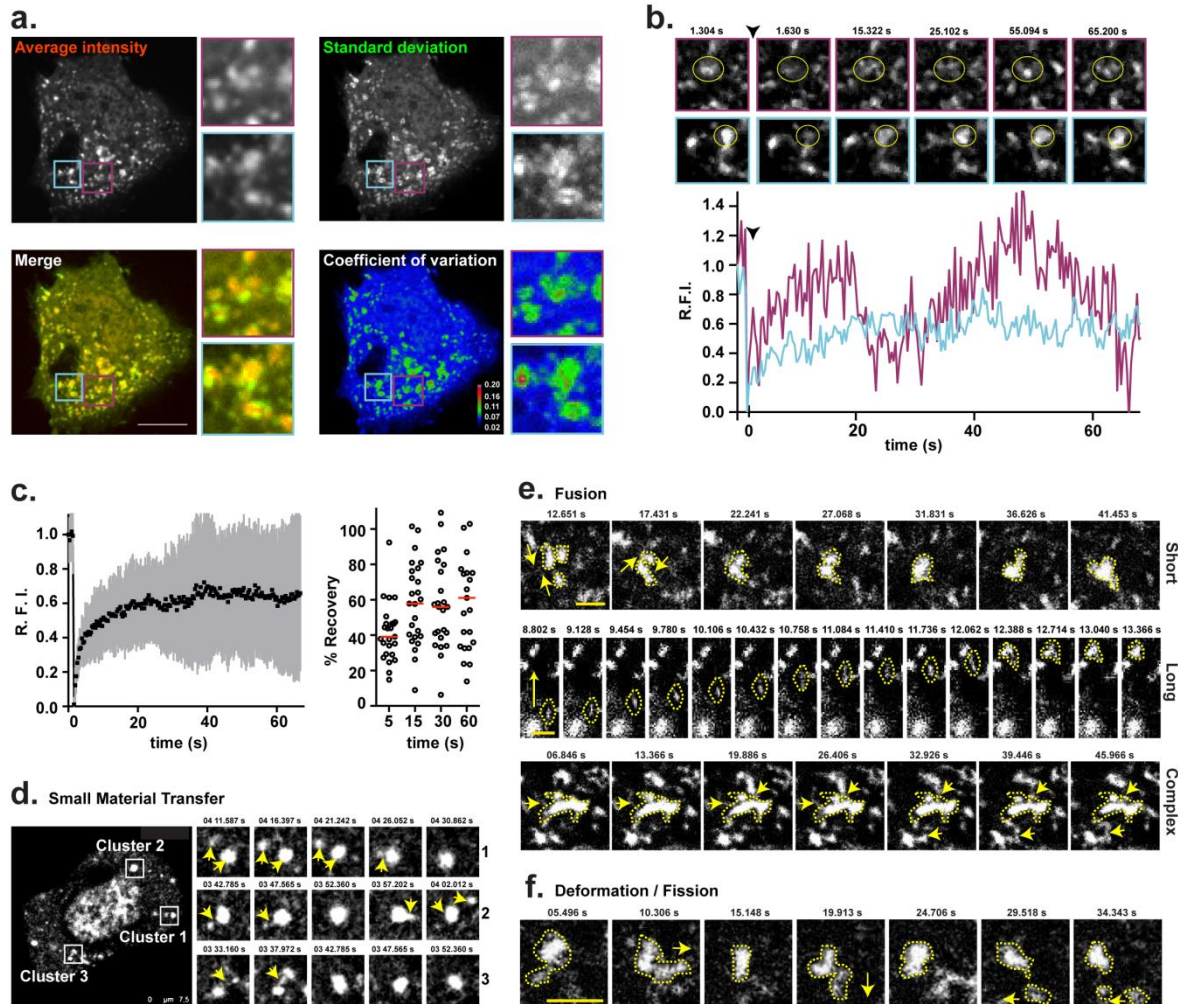

192  
 193 **Figure 2. vRNP/Rab11 inclusions have properties of liquid organelles and exchange material dynamically**

194 A549 cells were transfected with a plasmid encoding GFP-NP and co-infected with PR8 virus, at an MOI of 5, for 16  
 195 h. Cells were imaged under time-lapse conditions. **a.** A representative infected cell is shown. The fluorescence signal  
 196 of viral clusters in this cell is depicted as: average intensity (in red), standard deviation (in green), the merge of both,  
 197 and coefficient of variation. Two areas of viral NP inclusions, highlighted in purple and cyan boxes, were selected for  
 198 fluorescence recovery after photobleaching (FRAP). Bar = 10  $\mu\text{m}$  **b.** The photobleached regions are marked by a  
 199 yellow circle. The black arrowhead indicates the time of photobleaching. Relative fluorescence intensity (R.F.I.) was

200 plotted as a function of time for each particle. Images have been extracted from Supplementary Movie 3. **c.** R.F.I.  
201 was plotted as a function of time for the means of 25 FRAP events (left graph). The means are shown (black) with  
202 error bars representing the standard deviation (gray). The percentage of recovery of each photobleached region is  
203 shown for specific times (right graph), with means represented as red bars. A single experiment representative of two  
204 independent experiments is **d.** A representative infected cell is shown in the large image, with selected clusters  
205 marked by white boxes. Individual frames with single moving particles, from each cluster, highlighted with yellow  
206 arrows are shown in the small panels. Bar = 7.5  $\mu\text{m}$ . Images were extracted from Supplementary Movie 4. **e.**  
207 Individual frames show three distinct fusion events: at short distance – simple and complex – and at long distance. **f.**  
208 Similarly, deformation and/or fission event is shown. Yellow arrows highlight fusion (**e.**) or fission (**f.**) movements,  
209 whereas yellow dashed lines indicate the shape of clusters. Images were extracted from Supplementary Movies 5  
210 and 6. Bar = 2  $\mu\text{m}$ .

211

## 212 **IAV viral inclusions form when a single vRNP is expressed in cells.**

213 The most accepted model establishes that RNA-RNA interactions lead to the formation  
214 of viral inclusions. However, the dynamic exchange of material within clusters supports that  
215 these structures promote genome assembly. The formation of viral inclusions, measured by  
216 redistribution of Rab11, was reported on a mini-replicon system expressing only two vRNPs,  
217 segment 7 and 8<sup>10</sup>, for which no particularly strong RNA-RNA interactions have been  
218 demonstrated<sup>37,38</sup>. In addition, vRNPs self-repulse and compete to avoid repetition of a vRNP in  
219 a virion<sup>39-41</sup>. We tested whether RNA-RNA interactions were needed to form the liquid viral  
220 inclusions by assessing the formation of vRNP hotspots and the sub-cellular distribution of  
221 Rab11 in the same mini-replicon system expressing one or two segments. Cells were  
222 transfected with plasmids expressing the RdRp and NP (3P-NP), NS2 (to ensure nuclear export  
223 of vRNPs), segment 7 (that encodes for M1 and M2) and, when indicated, segment 8 (that  
224 expresses NS1 and NS2). Segment transcription originates a complete negative sense RNA, to  
225 which the RdRp binds, amplifying the system, mimicking viral transcription and replication. As  
226 control, the same system without the polymerase PB2 was evaluated (2P-NP).

227 Results show that Rab11 subcellular distribution did not change in any of the 2P-NP  
228 conditions, consistently with previous reports<sup>10</sup>. However, in the 3P-NP condition, Rab11  
229 redistributed, forming the characteristic enlarged puncta regardless of expressing one or two  
230 vRNPs, indicating that one vRNP is sufficient to form viral inclusions (Fig. 3a). The increase in  
231 areas of Rab11 puncta was significantly different between the 3P-NP and 2P-NP conditions  
232 when quantified and ranked based on their size: small inclusions up to  $0.15 \mu\text{m}^2$ , intermediate  
233 inclusions between  $0.15$  and  $0.30 \mu\text{m}^2$ , and large inclusions bigger than  $0.30 \mu\text{m}^2$  (Fig. 3b), as  
234 before<sup>14</sup>. Consistent with our own work, if vRNPs did not exit the nucleus by not including NS2,  
235 Rab11 distribution was similar to the 2P-NP condition (Fig 3b, 3P-NP seg7 without NS2).  
236 Similarly, in the case of 3P-NP, and independently of the number of segments expressed,  
237 vRNPs were detected in puncta, rather than dispersed, showing that vRNP hotspots are formed  
238 without requiring RNA interactions among distinct segments (Fig. 3c, upper panels). In the case  
239 of 2P-NP conditions, probes against the vRNA of segments 7 or 8 detected discrete dots in the  
240 nucleus (Fig. 3b, lower panels), consistent with pol I transcription and lack of amplification, as  
241 described before<sup>10</sup>. The expression of all components of each condition was evaluated by  
242 western blotting, except that of NS2, for which no good commercial antibody is available (Fig.  
243 3d). Confirming that the system was fully functional, the corresponding proteins of a specific  
244 segment were detected only in 3P-NP samples (Fig. 3d).

245 Collectively, the obtained results demonstrate that viral inclusions assemble in the  
246 presence of a single vRNP. The data indicates that formation of Rab11 enlarged puncta is  
247 dependent of vRNPs reaching the cytosol, but precedes and is not dependent on RNA-RNA  
248 interactions.

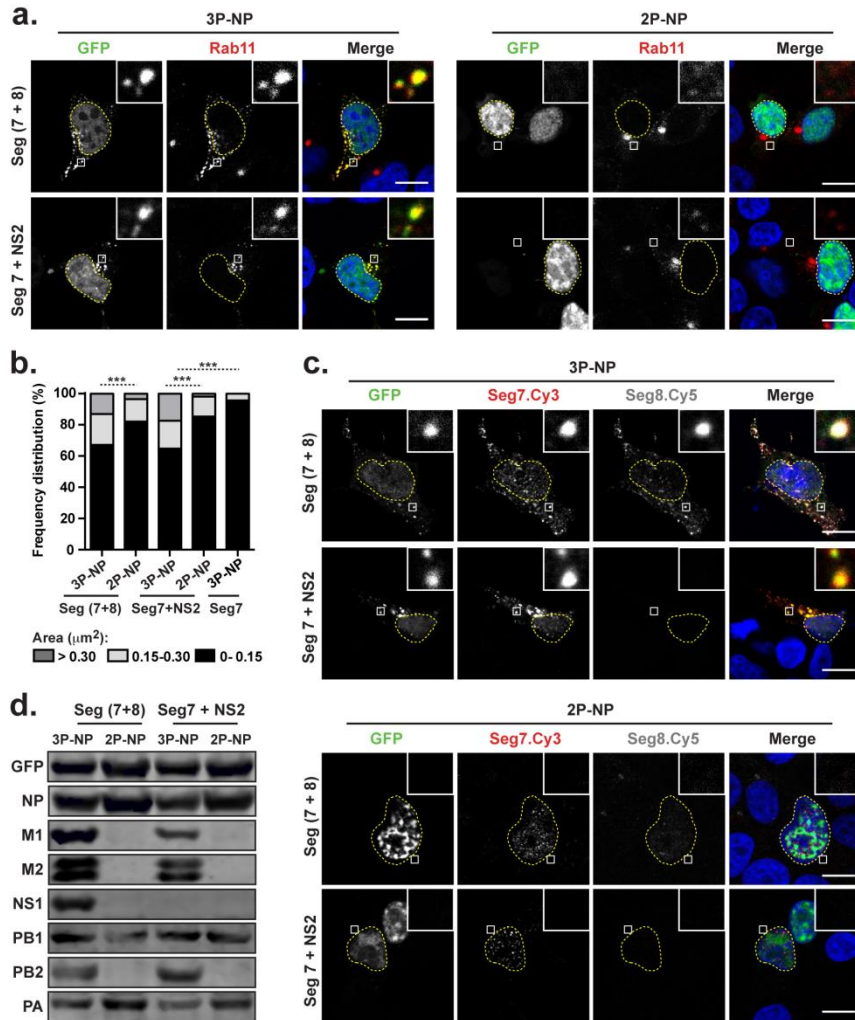

249

250 **Figure 3. Viral inclusions form in the absence of RNA-RNA interaction**

251 293T cells were transfected for 16 h with plasmids expressing vRNA segments 7 and 8, or segment 7 alone, and the  
 252 minimal protein components of an influenza RNP: the three polymerase proteins (3P) (or, as a nonfunctional control,  
 253 two polymerase proteins lacking PB2 - 2P) and NP, as well as with plasmids expressing GFP-NP. Cells were also  
 254 transfected with a plasmid encoding NS2, when segment 7 was expressed alone. **a.** Cells were fixed and stained for  
 255 Rab11 (red). White boxes show areas of co-localization between NP and Rab11. Nuclei are delineated by yellow  
 256 dashed lines. Bar = 10  $\mu\text{m}$ . **b.** The frequency distribution of Rab11 inclusions within the three area categories (in  
 257  $\mu\text{m}^2$ ) was plotted for each condition. Statistical analysis of data was performed using a non-parametric Kruskal-  
 258 Wallis test, followed by Dunn's multiple comparisons test (\*\*\*)  $p < 0.001$ . Statistical analysis compares the area of all  
 259 inclusions between conditions. Between 30 and 70 cells were analyzed per condition. **c.** Duplicate samples were  
 260 processed to detect segment 7 (red) and segment 8 (gray) RNA by FISH. White boxes show areas of co-localization



261 between NP and viral segments. Nuclei are delineated by yellow dashed lines. Bar = 10  $\mu$ m. **d.** Cells were lysed and  
262 indicated proteins were detected by Western blotting.

263

264 **vRNP-containing viral inclusions are not responsible for escaping innate**  
265 **immunity activation.**

266 It has been shown that phase-separated compartments are able to sequester or exclude  
267 specific material, including components of the innate antiviral immune response<sup>42,43</sup>. It is  
268 therefore possible that formation of IAV viral inclusions is a strategy to prevent the activation of  
269 cell-intrinsic defenses, either by sterically excluding sensors of exogenous material or by  
270 sequestering key factors of the downstream pathways. To address this hypothesis, we have  
271 used A549 cells constitutively expressing a fully functional or a non-functional form of GFP-  
272 tagged Rab11 (GFP-Rab11 wild type (WT) or GFP-Rab11 dominant negative (DN),  
273 respectively). These cells were established in our lab, and have been evaluated for growth rate  
274 and permissiveness to viral infection<sup>14</sup>. Both cell lines were infected with WT PR8 or an NS1  
275 mutant virus that does not express a functional form of the main viral factor suppressing cell  
276 antiviral responses (NS1-N81)<sup>44</sup>. To characterize viral infection, cells were fixed at 8 and 16 h  
277 post-infection (hpi), stained for NP protein and imaged by confocal microscopy (Fig. 4a).  
278 Changes in Rab11 subcellular distribution were quantified by measuring the area of Rab11  
279 inclusions in infected and control cells, and ranking them as above (Fig. 4b). As previously  
280 published by us<sup>14</sup>, infection of cells stably expressing GFP-Rab11 WT with WT PR8 virus  
281 induced a redistribution of Rab11, forming viral large inclusions that contained vRNPs (Fig. 4b).  
282 Furthermore, the frequency of large Rab11 inclusions increased as infection progressed from 8  
283 to 16 hpi. Noteworthy, infection of this cell line with the NS1 mutant virus produced similar  
284 changes in the frequency distribution of the different size category inclusions (Fig. 4b). Infection  
285 of GFP-Rab11 DN cell line, either with WT PR8 or NS1 mutant virus, did not change Rab11 DN  
286 distribution (Fig. 4a,b). Consistent with previous reports<sup>12,17,45</sup>, Rab11 DN was primarily localized



287 to the TGN, with some diffuse cytoplasmic staining also visible (Fig. 4a). Also in agreement with  
288 these studies, overexpression of Rab11 DN impaired the formation of viral inclusions  
289 characteristic of IAV infection and formation of vRNP hotspots<sup>11,13</sup>, and therefore NP was  
290 diffusely distributed throughout the cytoplasm (Fig. 4a). Next, we examined the impact of  
291 constitutively expressing GFP-Rab11 WT or DN on viral replication, by plaque assay (Fig. 4c).  
292 WT PR8 and NS1-N81 virus production in GFP-Rab11 DN cell line was significantly impaired  
293 when compared with GFP-Rab11 WT cell line, with an approximately 50% reduction in viral  
294 titres at 16 hpi (Fig. 4c). These results corroborate previous studies showing that a fully  
295 functional Rab11 protein is required for efficient infectious virus production<sup>12,45</sup>. As expected<sup>46</sup>,  
296 NS1 mutant virus replication was attenuated in both cell lines, as compared to WT PR8 virus  
297 (Fig. 4c). In order to investigate if impaired formation of viral clusters resulted in enhanced  
298 activation of the interferon (IFN) cascade, the transcript levels of type I (IFN- $\alpha$  and IFN- $\beta$ ) and  
299 type III (IL-29) IFN, and of the IFN-stimulated gene viperin, were analysed at 8 and 16 hpi. For  
300 positive control, cells were transduced with the double-stranded RNA mimic  
301 polyinosinic:polycytidylic acid [poly(I:C)]. Results show that there are no differences between  
302 both cell lines, in any of the conditions analysed (Fig 4d). Also, NS1 mutant virus induced higher  
303 mRNA levels than the WT virus, confirming the IFN-antagonizing role of NS1 (Fig 4d). At the  
304 protein level, cell lysates from infected cultures were probed for active, phosphorylated IFN  
305 regulatory factor 3 (IRF3), a hallmark of activation of the IFN induction cascade (Fig. 4e), and  
306 cell culture media were tested for the levels of secreted IFN- $\beta$  (Fig. 4f). Again, the results  
307 obtained were identical for both cell lines. In summary, all results point towards innate immune  
308 responses not being affected by biological phase transitions of vRNPs.  
309

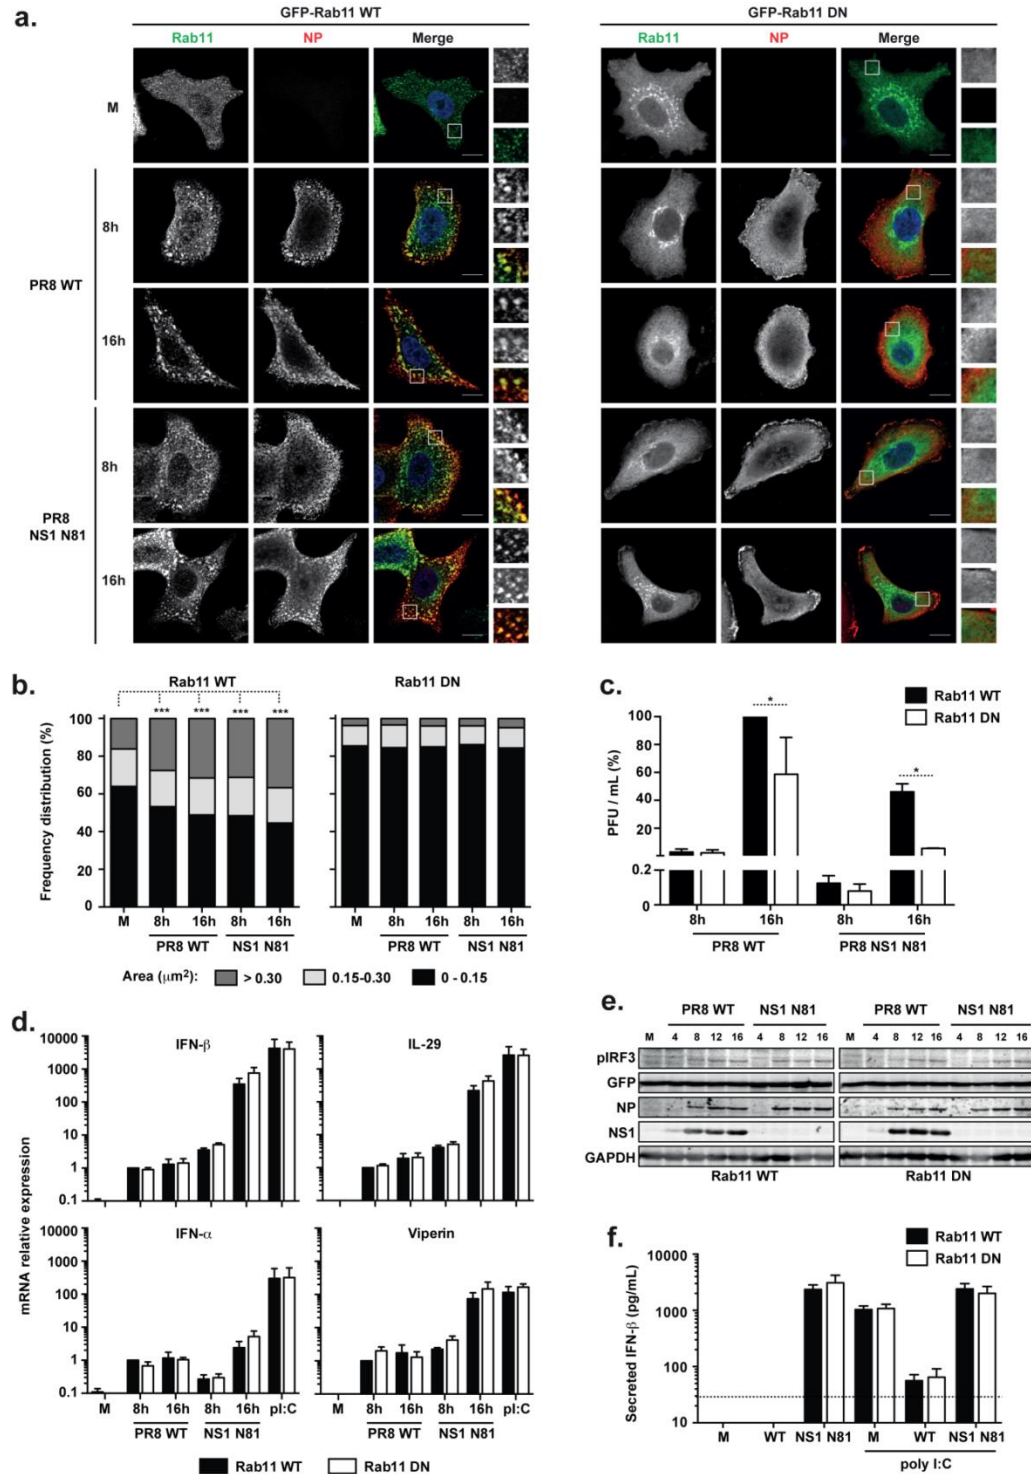

310

311 **Figure 4. Cell antiviral defenses are not affected by the formation of viral inclusions**

312 **a.** GFP-Rab11 WT and GFP-Rab11 DN cells were infected or mock-infected (M), at an MOI of 3, with PR8 WT or

313 NS1-N81 viruses. Cells were fixed at the indicated times and stained for NP (in red). Bar = 10  $\mu\text{m}$ .

314 **b.** The frequency distribution of NP inclusions within the three area categories (in  $\mu\text{m}^2$ ) was plotted for each cell line. Statistical

315 analysis of data was performed using a non-parametric Kruskal–Wallis test, followed by Dunn's multiple comparisons  
316 test (\*\*\*)  $p < 0.001$  for GFP-Rab11 WT cells; no statistical significance found for GFP-Rab11 DN cells). Statistical  
317 analysis compares the area of all inclusions between conditions. An average of 30 cells was analyzed per condition.  
318 A single experiment representative of two independent experiments is shown. **c.** At the indicated times, supernatants  
319 were collected and viral production was evaluated by plaque assays using MDCK cells. Statistical analysis of data  
320 was performed using two-way ANOVA test, followed by Sidak multiple comparisons test ( $*p < 0.05$  at 16 hpi; no  
321 statistical significance found at 8 hpi). Data represents the average of three independent experiments. **d.** Expression  
322 of IFN- $\beta$ , IFN- $\alpha$ , IL-29 and viperin was evaluated at the level of transcription by RT-qPCR in relation to GAPDH.  
323 Poly(I:C) was used as a positive control for maximum expression of these transcripts. Statistical analysis of data was  
324 performed using two-way ANOVA test, followed by Sidak multiple comparisons test (no statistical significance  
325 between conditions found). Data represents the average of three independent experiments. **e.** Expression of  
326 phosphorylated IRF, GFP, NP, NS1 and GAPDH was evaluated at the protein level by western blotting. **f.** The levels  
327 of secreted IFN- $\beta$  were quantified by ELISA in cell supernatants at 24 hpi. Poly(I:C) was used as a positive control for  
328 maximum expression of IFN- $\beta$  protein. The limit of detection of this method is 30 pg/mL (dashed line). Statistical  
329 analysis of data was performed using two-way ANOVA test, followed by Sidak multiple comparisons test (no  
330 statistical significance between conditions found). Data represents the average of three independent experiments.

331

### 332 **Viral inclusions form in the proximity of the ER, displaying matching movements.**

333 Given that phase separation is generally a spatially regulated process, we next asked  
334 whether this was the case for IAV viral inclusion assembly. It has recently been reported that  
335 vRNPs associate with the ER when leaving the nucleus and that Rab11 would collect vRNPs  
336 from the ER for delivery to the surface<sup>16</sup>. Our electron microscopy data also indicates that the  
337 ER is constantly found in close proximity to viral inclusions (Fig. 1b, yellow arrowheads). We  
338 therefore tested if clusters are associated with the ER, by using antibodies against different ER  
339 markers or a cell line expressing a fluorescent tagged-ER membrane marker (HeLa Sec61 $\beta$ -  
340 Emerald)<sup>47</sup>. Confocal imaging of cells at different times post-infection failed to identify co-  
341 localization between the ER and viral inclusions (Supplementary Fig. 2a-c). However, it was  
342 evident that, from 8 hpi onwards, the vRNP clusters dispersed throughout the cytoplasm were

343 frequently found juxtaposed to ER tubules (Supplementary Fig 2a-c, insets), suggesting an  
344 association between both structures. To gain insight into the dynamics of ER-viral inclusion  
345 association, live cell imaging was performed. For this, HeLa Sec61 $\beta$ -Emerald cells were  
346 transfected with mCherry-NP and infected with PR8 (Fig. 5a and Supplementary Movie 7), or  
347 A549 cells were co-transfected with mCherry-NP and ER-GFP and infected with PR8 virus (Fig.  
348 5b and Supplementary Movie 8). In both experiments, viral inclusions displayed movements that  
349 matched those of the ER, although it is not clear whether ER motion was driving displacement  
350 of viral inclusions or, conversely, viral inclusions were gliding over the surface of the ER tubules.  
351 The ER is a complex organelle, with distinct morphologies and diverse functions<sup>47-49</sup>. In order to  
352 identify the specific ER domain interacting with viral inclusions, we tested different markers,  
353 including Atlastin 3, which accumulates in 3-way junctions, Sec23 and Sec31, both present in  
354 ER Exit Sites (ERES). We observed no correlation between Atlastin 3 and vRNPs staining  
355 (Supplementary Fig. 2d), but Sec23 and Sec31 localized between the clusters and the ER, and  
356 even co-localized with NP in specific spots (Fig. 5c, Supplementary Fig. 2e). Live cell imaging of  
357 Sec16, another ERES component, indicates that these structures serve as docking platforms  
358 where vRNPs accumulate, allowing a constant flux of material in and out of viral inclusions, with  
359 frequent fission and fusion events taking place (Fig. 5d, Supplementary Movies 9 and 10).

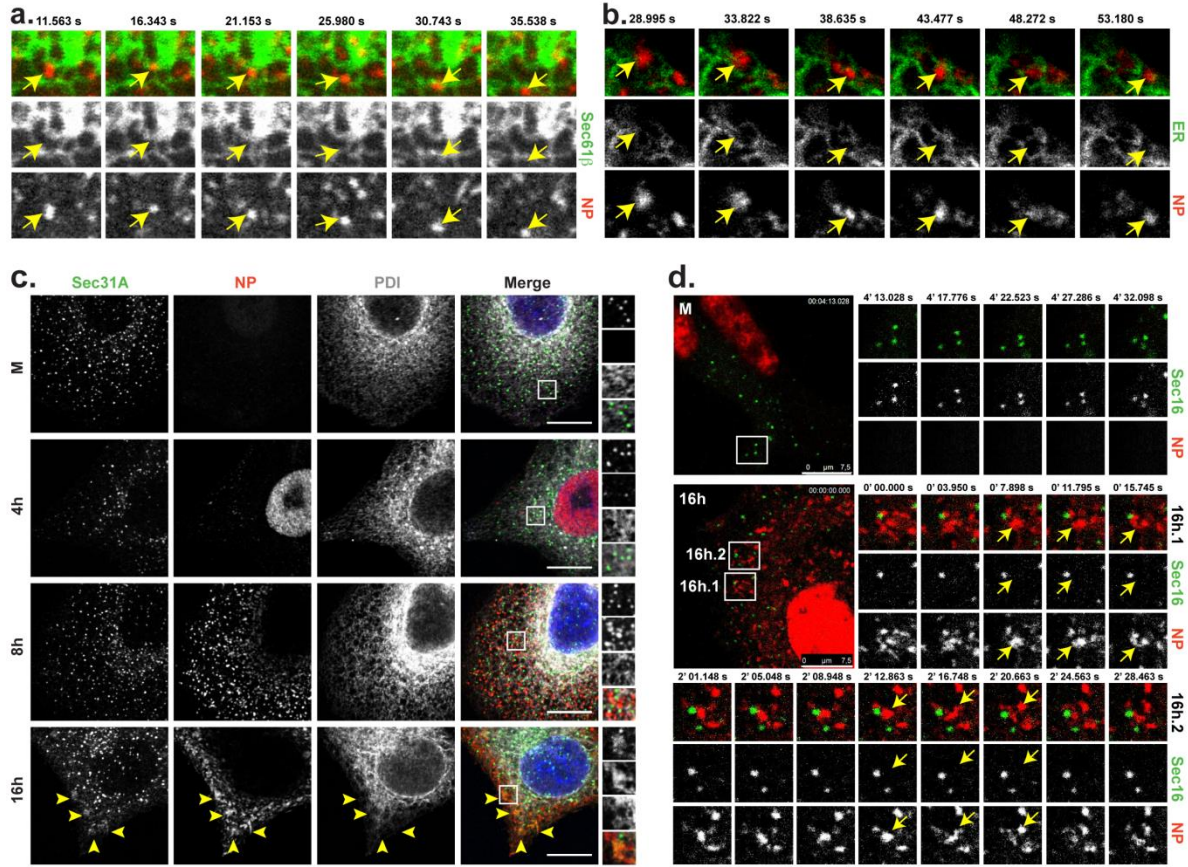

360

361 **Figure 5. Viral inclusions are associated with ER exit sites**

362 **a.** Sec61 $\beta$ -Emerald cells were transfected with mCherry-NP and infected with PR8 virus, at an MOI of 10, for 16 h. **b.**

363 A549 cells were co-transfected with plasmids encoding mCherry-NP and ER-GFP and infected with PR8 virus, at

364 MOI of 10, for 16h. **a., b.** Cells were imaged under time-lapse conditions. Individual frames with single moving

365 particles highlighted with yellow arrows are shown in the small panels. Bar = 2.5  $\mu$ m. Images were extracted from

366 Supplementary Movies 7 and 8. **c.** A549 cells were infected or mock-infected (M) with PR8 virus, at an MOI of 3, and

367 fixed at the indicated times. Cells were stained for the ER proteins Sec31 (in green) and PDI (in gray) and the viral

368 NP protein (in red). Areas highlighted by the white box are shown on the right of each panel. Bar = 10  $\mu$ m. **d.** A549

369 cells were co-transfected with plasmids encoding mCherry-NP and GFP-Sec16 and infected or mock-infected (M)

370 with PR8 virus for 16 h. Cells were imaged under time-lapse conditions. Representative cells are shown in the left

371 large images. Individual frames with single moving particles highlighted with yellow arrows are shown in the small

372 panels. Two examples are provided for the infected cell (16h.1 and 16h.2). Bar = 7.5  $\mu$ m. Images were extracted

373 from Supplementary Movies 9 and 10.

374



375 **Continuous Golgi-ER vesicular cycling controls the formation of viral inclusions.**

376 The ERES are specialized domains where secretory proteins are loaded into coat  
377 protein complex II (COPII)-coated vesicles and transported to the Golgi<sup>50</sup>. Recruitment of COPII  
378 proteins to the ERES is controlled by the Sar1 GTPase cycle<sup>51</sup>. This small-GTPase also  
379 regulates ER-membrane tubulation and vesicle fission, having a critical role in the generation of  
380 the ERES<sup>52</sup>. To analyse the effect of disrupting the ERES on the assembly of viral inclusions,  
381 we overexpressed a GTP-restricted mutant of GFP-tagged Sar1 (Sar1-GTP), which inhibits  
382 anterograde protein transport. Overexpression of GFP and GFP-tagged Sar1 WT were  
383 performed as controls. Immunofluorescence analysis showed that overexpression of Sar1-GTP  
384 strongly reduced the size of viral inclusions, when compared to overexpression of GFP or Sar1,  
385 in a statistically significant manner (Fig. 6a, b). The number of inclusions per  $\mu\text{m}^2$  of cellular  
386 area and the percentage of NP signal that is inside viral inclusions were also analyzed, with the  
387 latter being significantly reduced when Sar1-GTP was overexpressed [ $7.7 \pm 2.9\%$  (mean  $\pm$  SD)  
388 in Sar1-GTP vs  $12.7 \pm 3.8\%$  in GFP ( $p < 0.0001$ ) and  $11.1 \pm 3.4\%$  in SAR1 ( $p = 0.0005$ )] (Fig. 6b).  
389 Confocal imaging of the viral transmembrane protein hemagglutinin (HA) confirmed that Sar1-  
390 GTP is disrupting ER-Golgi trafficking, since this protein was retained and accumulated in the  
391 ER when Sar1-GTP was overexpressed, but reached the plasma membrane during GFP and  
392 Sar1 overexpression (Fig. 6c).



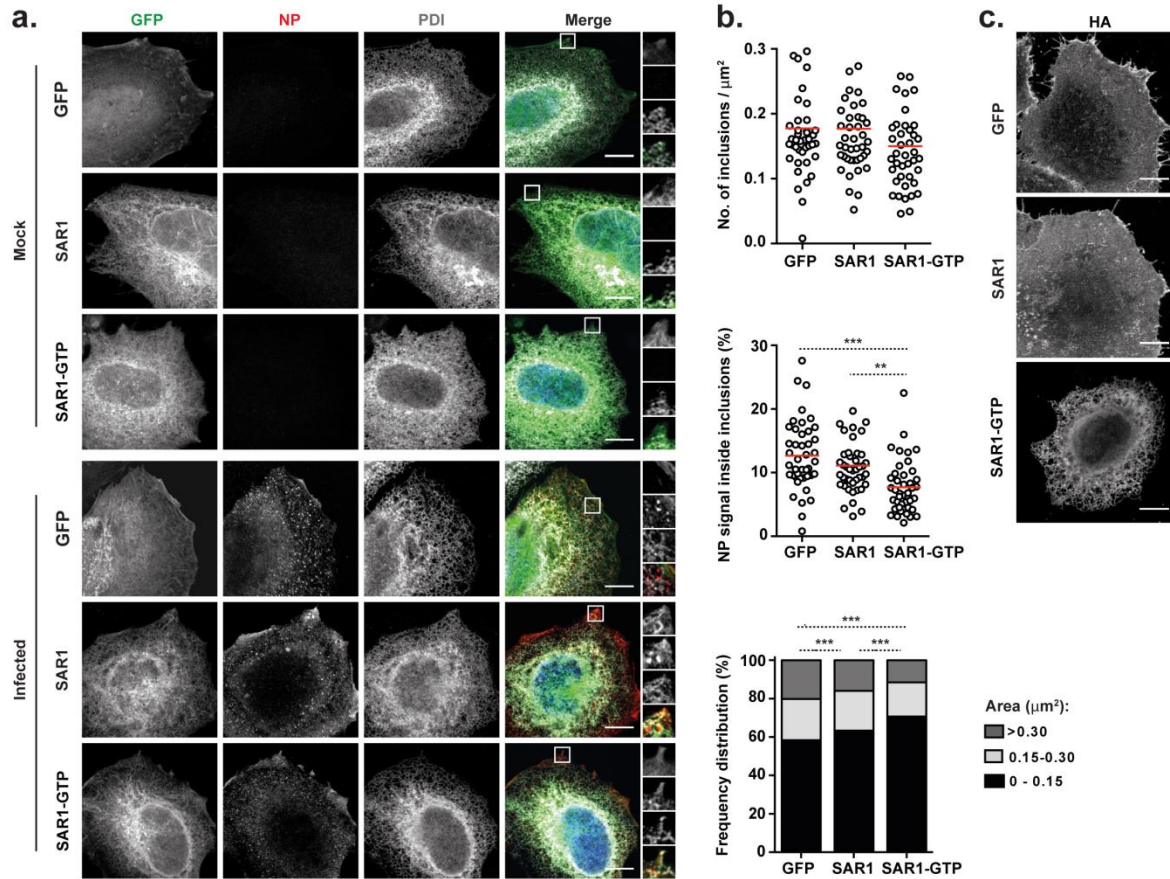

393

394 **Figure 6. vRNP clustering is impaired by disruption of ER-exit sites**

395 HeLa cells were transfected with plasmids encoding GFP, SAR1 WT-GFP or SAR1 GTP-GFP and, 24 h later,  
 396 infected or mock-infected with PR8 virus, at an MOI of 10. At 16 hpi, cells were fixed and processed for  
 397 immunofluorescence. **a.** Cells were stained for the viral protein NP (in red) and for the ER protein PDI (in gray). Areas  
 398 highlighted by the white box are shown on the right of each panel. **b.** The frequency distribution of NP inclusions  
 399 within the three area categories (in  $\mu\text{m}^2$ ), the number of inclusions per  $\mu\text{m}^2$ , and the percentage of NP staining that is  
 400 inside inclusions were plotted for each condition. Statistical analysis of data was performed using a non-parametric  
 401 Kruskal–Wallis test, followed by Dunn's multiple comparisons test (\*\*\*)  $p < 0.001$ ). More than 40 cells from 2  
 402 independent experiments were analyzed per condition. **c.** Infected cells were stained for the viral protein HA and  
 403 imaged by confocal microscopy. Bar = 10  $\mu\text{m}$ .

404

405 The above results suggest that the establishment of viral inclusions may also require the  
 406 Golgi compartment. To address this issue, we inhibited the shuttling of cargo proteins between

407 the Golgi and the ER by treating cells with brefeldin A (BFA)<sup>53,54</sup>. Upon addition of a low dosage  
 408 of BFA to cells infected for 8 h, viral inclusions disassembled within less than 1 hour (Fig. 7a,  
 409 lower panel). There was a robust and statistically significant decrease in the size [from  $0.242 \pm$   
 410  $0.203 \mu\text{m}^2$  (mean  $\pm$  SD) to  $0.189 \pm 0.154 \mu\text{m}^2$ ,  $p < 0.0001$ ] and number of viral inclusions per  $\mu\text{m}^2$   
 411 (from  $0.264 \pm 0.051$  to  $0.179 \pm 0.056$ ,  $p < 0.0001$ ), as well as in the percentage of NP that was  
 412 inside the inclusions (from  $17.5 \pm 4.8$  to  $9.2 \pm 2.8\%$ ,  $p < 0.0001$ ) (Fig. 7b). Immunostaining of cells  
 413 with ER and Golgi makers (PDI and GM130, respectively) revealed that BFA treatment  
 414 provoked the disassembly of the Golgi complex, as expected<sup>53,54</sup>, but not of the ER (Fig. 7a).  
 415 Areas stained for Rab11 also decreased with BFA treatment (Fig. 7c). Note that the viral  
 416 transmembrane protein M2 still localized at the plasma membrane, likely because of low dosage  
 417 ( $2 \mu\text{g/mL}$ ) and short duration (1 h) of the BFA treatment (Fig. 7c)<sup>53,54</sup>. In sum, the data  
 418 collectively shows that biogenesis of IAV liquid viral inclusions enriched in vRNPs and Rab11 is  
 419 dependent on continuous cycles of material between the ER and the Golgi, indicating that its  
 420 distribution is spatially regulated.

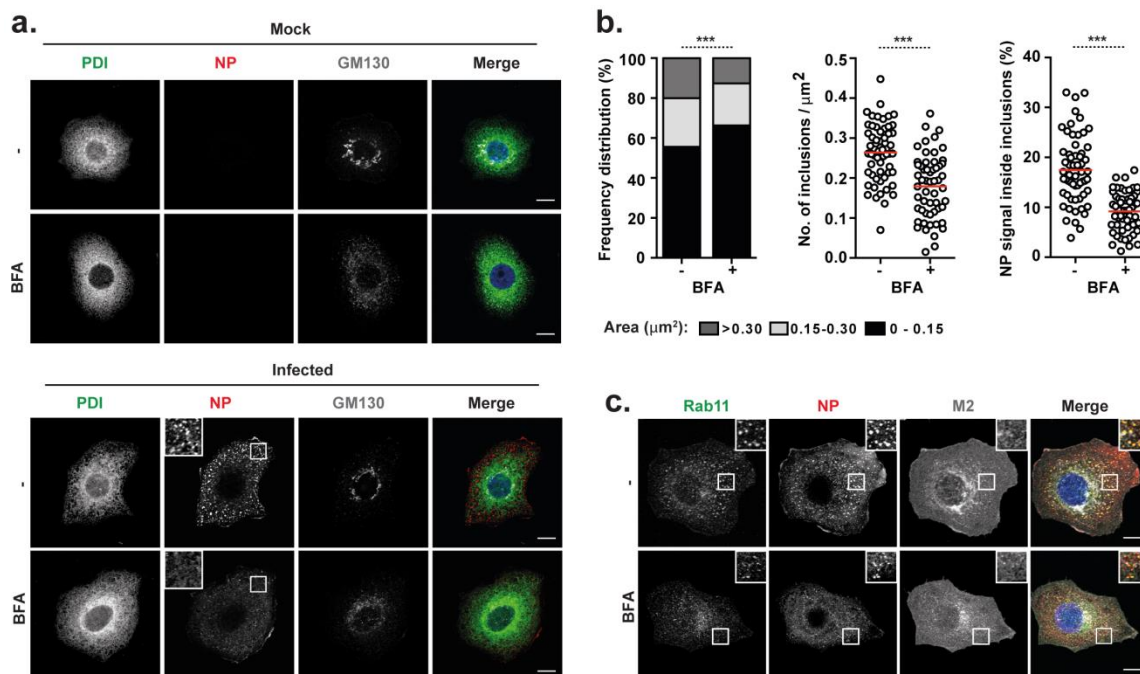

421

422 **Figure 7. Disruption of ER-Golgi trafficking disassembles vRNP hotspots.**

423 A549 cells were infected or mock-infected with PR8 virus at an MOI of 3 for 8 h, and then treated or mock-treated  
424 with 2  $\mu\text{g}/\text{mL}$  of brefeldin A (BFA) for 1h. **a.** Cells were immunostained for the ER marker PDI (in green), the viral  
425 protein NP (in red) and the cis-Golgi marker GM130 (in gray) and imaged by confocal microscopy. Selected areas of  
426 the cytoplasm are marked by white boxes and displayed on the top left corner of the images. Bar = 10  $\mu\text{m}$ . **b.** The  
427 frequency distribution of NP inclusions within the three area categories (in  $\mu\text{m}^2$ ), the number of inclusions per  $\mu\text{m}^2$ ,  
428 and the percentage of NP staining that is inside inclusions were plotted for each condition. Statistical analysis of data  
429 was performed using a non-parametric Kruskal–Wallis test, followed by Dunn's multiple comparisons test (\*\*\*p  
430 <0.001). An average of 60 cells from 2 independent experiments was analyzed per condition. **c.** Infected cells were  
431 stained for the host protein Rab11 (in green) and the viral proteins NP (in red) and M2 (in gray). Cells were imaged by  
432 confocal microscopy. Areas highlighted by the white box are shown on the right top corner of each image. Bar = 10  
433  $\mu\text{m}$ .

434

## 435 Discussion

436 Phase separation by liquid demixing drives functional compartmentalization in cells. It  
437 allows the dynamic isolation of sets of selected molecules<sup>35</sup> to carry out activities separated  
438 from the surroundings without the need of a membrane<sup>55</sup>. Many membraneless organelles, as  
439 the nucleolus<sup>33</sup> and centrosomes<sup>34</sup>, constitutively exist in the cell, while others appear after an  
440 insult, as stress granules<sup>36</sup>, DNA repair foci<sup>56</sup> or G bodies<sup>57</sup>. These organelles are beginning to  
441 be accepted as a disseminated biological fast adaptation mechanism to respond to stimuli<sup>36,56-58</sup>.  
442 How viruses take advantage of these phenomena is unclear, despite decades have passed  
443 since the realization that many infected cells display viral-induced membraneless territories  
444 associated with viral replication, viral assembly, and host immune escape<sup>24,28,29,42</sup>.

445 Here, we report that IAV leads to formation of cytosolic inclusions with liquid-like  
446 properties (Figs. 1 and 2). They have similar physical characteristics to those found in rabies  
447 virus-infected cells in terms of shape, dynamism and ability to deform<sup>43</sup>, but are not involved in  
448 viral replication as it takes place in the host cell nucleus. In addition, these structures also share  
449 properties with other reported liquid bodies including reacting fast to physiological changes<sup>31,59</sup>.

450 Formation of these condensates during IAV infection is dependent on Rab11-GTP and on  
451 vRNPs. Despite the common characteristics of the molecules involved in IAV inclusion bodies  
452 with those described for other membraneless bodies, including multivalency (Rab11)<sup>60,61</sup>,  
453 internally disordered regions (NP)<sup>31,62</sup>, nucleic acids (vRNPs)<sup>63</sup>, and oligomerizing RNA binding  
454 proteins (NP)<sup>64</sup>, the rules underlying the formation of IAV liquid organelles and their functions  
455 are far from understood.

456 The IAV-induced inclusions were postulated to originate as vRNPs travelling through the  
457 cytosol on Rab11 membranes collided, establishing RNA-RNA interactions *in trans*. Inclusions  
458 would contain partial to fully assembled genomes<sup>6,11,13,23</sup>. In this work, we provide evidence that  
459 viral inclusions are formed with one vRNP (Fig. 3), which indicates that their formation precedes  
460 viral assembly. This supports the idea that viral inclusions could operate as dedicated spots in  
461 the cytosol to facilitate establishment of RNA-RNA interactions among the eight different  
462 segments. This model still accommodates the hypothesis that vesicular collision could drive  
463 genome assembly and is consistent with a selective process for assembling the supra-  
464 molecular genomic complex. However, as depicted in the model of Figure 8, these interactions  
465 would be restricted in space, taking place in viral inclusions rather than the entire cytosol, and a  
466 constant exchange of material between different viral inclusions would replenish vRNP stocks  
467 and remove fully assembled genomes by an unclear process. Nevertheless, for the exchange of  
468 material to occur, viral inclusions need to move.

469

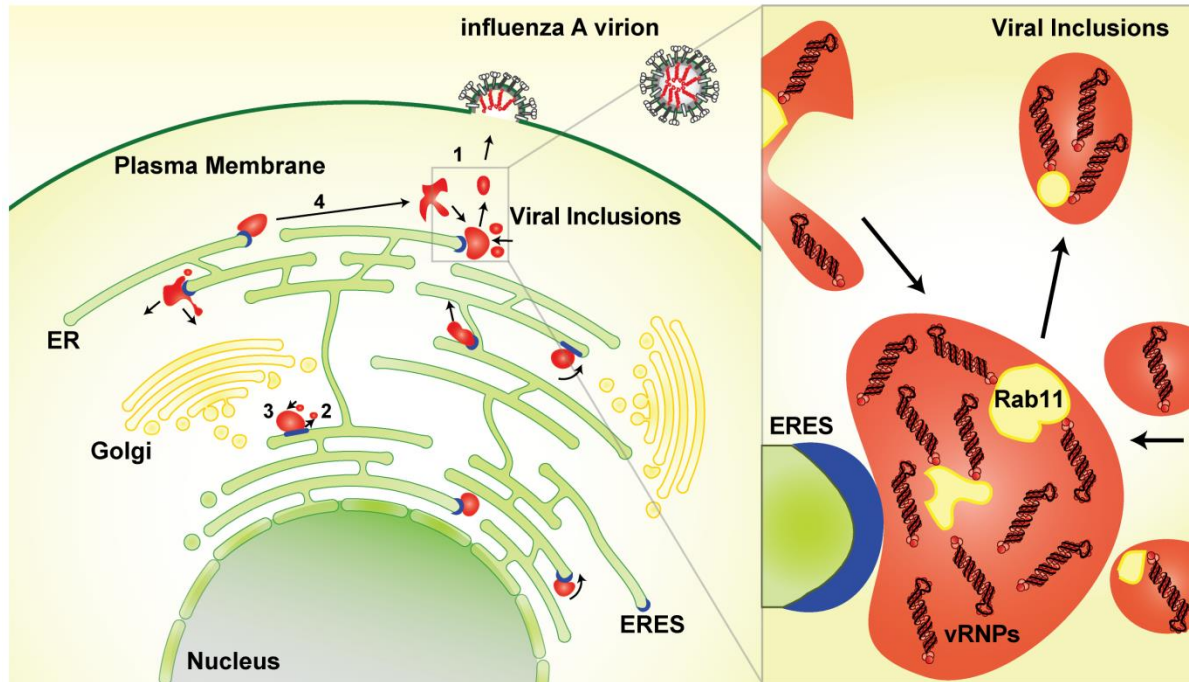

470

471 **Figure 8. Proposed model**

472 Viral inclusions (in red) exhibit characteristics of liquid organelles, segregating from the cytosol without a delimiting  
473 membrane. Viral inclusions exchange material dynamically (1) and deform easily exhibiting fission (2) and fusion (3)  
474 events. Viral inclusions can travel long distances before and after fusion/fission events (4), respectively. These  
475 organelles are formed in the vicinity of ERES (in blue) and their assembly is dependent on continuous ER-Golgi  
476 vesicular cycling. We propose that viral inclusions trigger nucleation of RNA-RNA interactions among the eight  
477 different segments to assemble a complete IAV genome. Inlet shows composition of viral inclusions close to ERES.  
478 These contain vRNPs of all types, Rab11 and host membranes clustered, but are not delimited by lipid bilayer.

479

480 Our work indicates a cross-talk between molecular motors and viral inclusions, with  
481 different viral inclusions fusing or dividing in a manner dependent of sheer force (Fig. 2). In  
482 addition, IAV Rab11/vRNPs hotspots were shown to exhibit heterogeneous movements, as if  
483 moving on actin or sliding on microtubules<sup>10,17,30</sup>, using molecular motors<sup>65</sup>. However, it was  
484 recently reported that, in the absence of intact microtubules, vRNAs could be transported  
485 through the cytoplasm independently of Rab11-GTP<sup>66</sup> and a candidate that was recently  
486 proposed was the ER<sup>16</sup>. Our work shows, using distinct ways, that molecular crowding occurs in



487 the vicinity of ERES (Fig. 5) and is dependent on continuous vesicular cycling between ER and  
488 Golgi (Figs. 6 and 7). This suggests that inclusion formation is spatially regulated. In fact, the  
489 movement of IAV inclusions matches that of the ER (Fig. 5) and, in some cases, inclusions  
490 seem to slide on ER membranes (Supplementary Movies 7 and 8). This raises the possibility  
491 that viral inclusions move gliding through the ER. This notion is in agreement with vRNPs being  
492 found at the ER<sup>16</sup>. Interestingly, biogenesis of viral inclusions seems to be intertwined with  
493 deregulation of the ERC, which is coherent with a decrease in recycling of transferrin during  
494 infection<sup>14,21</sup>, and with Rab11 detection in the ER, as if it was re-directed to this organelle during  
495 infection<sup>16</sup>. Whether Rab11 vesicles are targeted to the ER to deliver or to collect vRNPs will be  
496 addressed in the future. Inhibiting ER-Golgi vesicle cycles has efficiently locked HA, but not  
497 vRNPs, in the ER (Figs. 6 and 7), which supports the former hypothesis, but more experiments  
498 are necessary to validate one model. In both cases, there are unresolved questions regarding:  
499 1) the transport of vRNPs to or from the ER; 2) the selection of the ERES as docking sites for  
500 viral inclusions and 3) the sensing and transport of fully assembled genomes to the plasma  
501 membrane.

502         Nevertheless, for several biological systems, an intimate association between RNA and  
503 liquid membraneless organelles has been reported<sup>57,67-69</sup>. In some cases, RNA promotes phase  
504 separation<sup>57,67</sup>, while in other it inhibits this process<sup>68,69</sup>. Many membraneless organelles are  
505 involved in RNA metabolism, as is the case of Cajal bodies, nucleoli or stress granules, and  
506 therefore it is not surprising that liquid bodies could be involved in IAV genome assembly.  
507 Phase separation could however play other roles during IAV infection. We found no differences  
508 in the activation of IFN response when viral inclusion assembly was inhibited (Fig. 4), but we  
509 have not tested exhaustively other immune related parameters. IAV-induced phase separation  
510 leads to localized concentration of vRNPs and many proteins (some possibly unidentified). As  
511 shown for other systems, it could operate in signal amplification<sup>70</sup> or repression/activation of  
512 specific cellular pathways by exclusion/inclusion of selected molecules<sup>71</sup>.



513           Although we favor involvement in viral assembly by spatially restricting vRNPs and  
514 facilitate interactions, compelling evidence is required to formally validate this model.  
515 Importantly, future experiments will have to detail the internal organization of the viral inclusions.  
516 In particular, whether different vRNPs define physical cross-links and establish differences in  
517 the property of the material, leading to spatial organization, or alter the diffusion/movement  
518 within inclusions, remains to be seen. Besides spatial organization, other factors affecting liquid  
519 properties include molecular crowding, solubility affinity or the valency of phase-separating  
520 proteins<sup>71</sup> and these could fluctuate during the course of infection. We are just beginning to  
521 understand the involvement of liquid-liquid phase separation in virology, but we anticipate that,  
522 given the ancient co-evolution between viruses and eukaryotic cells, and the diversity of host  
523 strategies used by viruses, the next years will provide an interesting overlap between the two  
524 fields.

525

## 526 **METHODS**

527 **Cells, Viruses and Drugs.** The human epithelial cells Madin-Darby Canine Kidney (MDCK),  
528 embryonic kidney 293T, cervical HeLa and alveolar basal (A549) were a kind gift of Prof Paul  
529 Digard, Roslin Institute, UK. The GFP-Rab11 WT and GFP-Rab11 DN (A549) were produced by  
530 our laboratory<sup>14</sup>. The Sec61 $\beta$ -Emerald (HeLa) cell line was a kind gift from Dr Christoph Dehio,  
531 Biozentrum, University of Basel, Switzerland<sup>47,72</sup>. All cell types were cultured as described  
532 before<sup>10</sup> and were regularly tested for mycoplasma contamination with the LookOut  
533 mycoplasma PCR detection kit (Sigma, MP0035), using JumpStart Taq DNA Polymerase  
534 (Sigma, D9307). Reverse-genetics derived A/Puerto Rico/8/34 (PR8 WT; H1N1) was used as a  
535 model virus and titrated according to reference<sup>14</sup>. NS1 N81 mutant virus was derived from PR8  
536 WT and expresses only the first 81 amino acids of NS1<sup>44</sup>. Reverse genetic plasmids were  
537 contributed by Dr Ron Fouchier, Erasmus MC, Netherlands. Virus infections were performed at  
538 a multiplicity of infection (MOI) of 3 to 10. After 45 min, cells were overlaid with DMEM

539 containing 10% fetal bovine serum (Gibco, Life Technologies, 10500-064) and 1% penicillin /  
540 streptomycin mix (Biowest, L0022-100). The drug brefeldin A (Sigma) was dissolved in ethanol  
541 and used at final concentration of 2  $\mu$ g/ml.

542

543 **Plasmids.** HA tagged Sec23 plasmid was a kind gift from Dr Colin Adrain, IGC, Portugal. GFP  
544 tagged Sec16 plasmid was purchased from Addgene. GFP-Sec61 $\beta$  was constructed by PCR-  
545 amplifying Sec61 $\beta$  from A549 cDNA and cloning it into pEGFP-C2, using *HindIII* and *KpnI*  
546 restriction sites. Sar1A was amplified from A549 cDNA and cloned *XhoI*-*BamHI* restriction sites  
547 of pEGFP-N1. GTP-restricted SAR1 (H79G) was produced by site-directed mutagenesis from  
548 SAR1 WT-GFP. ER-GFP plasmid was made from pEGFP-C2, by inserting a C-terminal KDEL  
549 sequence by site-directed mutagenesis, and an N-terminal ER-signal sequence from calreticulin  
550 by oligo-annealing between *NheI* and *AgeI* restriction sites. Plasmids used for the minireplicon  
551 system have been described in reference<sup>10</sup>, except pcDNA3-NS2. The latter was made by PCR  
552 amplification of NS2 (from PR8) and insertion into pCDNA3, using *EcoRI* and *NotI* restriction  
553 sites. The following primers/oligos were used:

554 Sec61 $\beta$  Fw: 5'-TAGAAAGCTTCATGCCTGGTCCGACCC-3'

555 Sec61 $\beta$  Rv: 5'-TCGAGGTACCCTACGAACGAGTGTACTTGCCC-3'

556 SAR1 WT Fw: 5'- TCGACTCGAGATGTCTTTCATCTTTGAGTGGATCT- 3'

557 SAR1 WT Rv: 5'- TCGAGGATCCCGGTCAATATACTGGGAGAGCCAGC- 3'

558 SAR1 H79G FW: 5'- TTTTGATCTTGGTGGGGGCGAGCAAGCACGTTCGC - 3'

559 SAR1 H79G RV: 5'- GCGACGTGCTTGCTCGCCCCACCAAGATCAAAA - 3'

560 KDEL Fw: 5'-TGGACGAGCTGTACAAGGACGAGCTGTAATCCGGCCGGACT-3'

561 KDEL Rv: 5'- AGTCCGGCCGGATTACAGCTCGTCCTTGTACAGCTCGTCCA-3'

562 Calreticulin tag up: 5'-

563 CTAGCATGCTGCTATCCGTGCCGTTGCTGCTCGGCCTCCTCGGCCTGGCCGTGCA-3'

564 Calreticulin tag down: 5'-

565 CCGGTGCGACGGCCAGGCCGAGGAGGCCGAGCAGCAACGGCACGGATAGCAGCATG-3'

566 NS2 Fw: 5'-CGTAGCGAATTCATGGATCCAAACACTG-3'

567 NS2 Rv: 5'-GCTAAGACGCGGCCGCTTAAATAAGCTGAAAC-3'

568

569 **Transfections.** Cells, grown to 70% confluency in 24 well plates, were transfected with 250 ng  
570 of indicated plasmids or 100 ng of the synthetic dsRNA polyinosinic:polycytidylic acid [poly(I:C);  
571 Calbiochem], using Lipofectamine LTX (Life Technologies) and Opti-MEM (Life Technologies),  
572 according to manufacturer's instructions. Cells were infected or mock-infected 16 h post-  
573 transfection or simultaneously with transfection (live-cell imaging) at indicated MOI.

574 To reconstitute GFP-tagged RNPs, 293T cells grown to 70% confluency in 24 well plates were  
575 transfected with plasmids pcDNA PB1, PB2, PA (130 ng each), NP (150 ng), GFP-NP (50 ng),  
576 pPol I segments 7 and 8 (130 ng each) or/and pcDNA-NS2, using Lipofectamine 2000  
577 (Invitrogen) according to the manufacturer's instructions, incubated overnight, and imaged  
578 around 12-16 h later.

579

580 **Confocal fixed-cell imaging.** Fluorescent *in situ* hybridization (FISH) assay was done as in<sup>10</sup>.  
581 Immunofluorescence assays were performed as in<sup>10</sup>. Antibodies used were: rabbit polyclonal  
582 against Rab11a (1:100; Life Technologies, 715300), HA tag (1:500; Abcam, 9110), calnexin  
583 (1:1000, Abcam, 22595), atlastin 3 (1:100; Proteintech, 16921-1-AP) and NP (1:1000; gift from  
584 Prof Paul Digard); mouse monoclonal against NP (1:1000; Abcam, 20343), virus HA (neat; gift  
585 from Prof Paul Digard), M2 (1:500, Abcam, 5416), PDI (1:500, Life Technologies, MA3-019) and  
586 Sec31A (1:100; BD Biosciences, 612350); goat polyclonal against ERp57 (1:200; Sicgen,  
587 AB0003-200). Secondary antibodies were all from the Alexa Fluor range (1:1000; Life  
588 Technologies). Single optical sections were imaged with a Leica SP5 live confocal microscope.  
589 Cluster size was quantified as published previously<sup>14</sup>. Distributions (in %) were calculated and

590 plotted by GraphPad Prism. Images were post-processed using Adobe Photoshop CS5 and  
591 ImageJ (NIH).

592

593 **Live cell imaging.** Cells were grown in chambered glass-bottomed dishes (Lab-Tek) and  
594 maintained at 37°C in Leibovitz L-15 CO<sub>2</sub>-independent medium (Gibco) during imaging.

595 Samples were imaged using Leica SP5 Inverted or Roper TIRF Spinning Disk (Yokogawa CSU-  
596 X1) and post-processed using Adobe Photoshop CS5 and ImageJ (NIH).

597 For fluorescence recovery after photobleaching (FRAP) analysis, cells were transfected with  
598 250 ng of GFP-NP and immediately superinfected with PR8 at an MOI of 10. At 12 hpi, media  
599 was substituted for Leibovitz L-15 media to buffer CO<sub>2</sub> and data acquisition started on a Roper  
600 TIRF Spinning Disk (Yokogawa CSU-X1) with a cage incubator to control temperature at 37 °C.

601 After excitation with a 491 nm laser (Cobolt 491, 100 mW), fluorescence from GFP was  
602 detected with a 100x oil immersion objective (Plan Apo 1.49), a bandpass filter (525/45  
603 Chroma), and a photometrics 512 EMCCD camera. All FRAP experiments were performed

604 similarly using iLas FRAP module (Rope Scientific): 2 sec prebleach, 12.18 msec/μm<sup>2</sup> bleach,  
605 60 sec postbleach at a frame rate of 3 images per second. Bleaching was performed in a  
606 variable circular area to target complete viral inclusions. For FRAP analysis, samples were

607 corrected for background fluorescence and acquisition photobleaching as described previously  
608 by the Phair method<sup>73</sup>. After normalization, FRAP curves were fitted following the exponential  
609 function:  $Y=Y_0 + (\text{Plateau}-Y_0)*(1-\exp(-D*x))$ , where:

610 Y<sub>0</sub>: Y value when X (time) is zero. It is expressed in the same units as Y.

611 Plateau (must be less than one): Y value at infinite times, expressed in the same units as Y. D:  
612 rate constant, expressed in reciprocal of the X axis time units.

613 Tau: time constant, expressed in the same units as the X axis. It is computed as the reciprocal  
614 of D.

615 Half-time: time units of the X axis. It is computed as  $\ln(2)/D$ .

616 Span (mobile phase): difference between Y0 and Plateau, expressed in the same units as your  
617 Y values.

618

619 **Tokuyasu – Double Immunogold labeling.** Cells infected with PR8, at an MOI of 5, were fixed  
620 in suspension using 2% (v/v) formaldehyde (EMS) and 0.2% (v/v) glutaraldehyde (Polysciences)  
621 in 0.1 M Phosphate buffer (PB), for 2 h at RT. Subsequently, cells were centrifuged and washed  
622 with PB. The aldehydes were quenched using 0.15% (w/v) glycine (VWR) in 0.1 M PB for 10  
623 min at RT. Cells were infiltrated in 12% (w/v) gelatin (Royal) for 30 min at 37°C and centrifuged.  
624 The gelatin was solidified on ice, cut into 1 mm<sup>3</sup> cubes and placed in 2.3 M sucrose (Alfa Aesar)  
625 in 0.1 M PB, ON at 4°C. The cubes were mounted onto specimen holders and frozen at -196°C  
626 by immersion into liquid nitrogen. Samples were trimmed and cut into 50 nm-thick sections (in a  
627 Leica EM-FC7 at -110°C) and laid onto formvar-carbon coated 100-mesh grids.

628 For immunogold labeling, sections were blocked with PBS/1% BSA for 20 min at RT. Antibody  
629 staining was done sequentially in PBS/1% BSA at RT: rabbit anti-GFP (1:500, 1 h), goat anti-  
630 rabbit IgG conjugated to 18 nm-gold (1:20, 30 min), mouse anti-NP (1:200, 1 h) and goat anti-  
631 mouse IgG conjugated with 6 nm-gold (1:20, 30 min). Gold particles were fixed by applying 1%  
632 (v/v) formaldehyde in PBS for 5 min at RT. Blocking and extensive washing were performed in-  
633 between stainings. In the final step, gold particles were fixed using 1% (v/v) glutaraldehyde  
634 (Polysciences) for 5 min RT. Grids were washed in distilled H<sub>2</sub>O and counterstained using  
635 methyl-cellulose–uranyl acetate solution for 5 min on ice. EM images were acquired on a Hitachi  
636 H-7650 operating at 100 keV equipped with a XR41M mid mount AMT digital camera. Images  
637 were post-processed using Adobe Photoshop CS5 and ImageJ (NIH).

638

639 **Correlative light and electron microscopy (CLEM).** Cells, seeded onto gridded dishes  
640 (MatTek Corporation, P35G-2-14-C-GRID), were transfected with GFP-NP and simultaneously  
641 infected or mock-infected with PR8 at an MOI of 10. At indicated times, cells were fixed, imaged

642 at the confocal microscope Leica SP5 Inverted and finally processed for electron microscopy  
643 imaging, as described previously<sup>14</sup>. Sections of 70 nm thickness were cut using a Leica EM-FC7  
644 Ultramicrotome. The regions of interest were acquired with a Hitachi H-7650 operating at 100  
645 keV equipped with a XR41M mid mount AMT digital camera. Images were post-processed using  
646 Adobe Photoshop CS5 and ImageJ (NIH).

647

648 **Western blotting.** Western blotting was performed according to standard procedures and  
649 imaged using a LI-COR Biosciences Odyssey near-infrared platform as in<sup>45</sup>. Antibodies used  
650 included: rabbit polyclonal against pIRF3 (1:1000; Cell Signal, 4947), virus NP (1:1000), PB1,  
651 PB2, PA and NS1 (all at 1:500), kindly provided by Prof. Paul Digard, Roslin Institute, UK; goat  
652 polyclonal against green fluorescent protein (GFP) (1:2000; Sicgen, AB0020), GAPDH (1:2000;  
653 Sicgen, AB0049) and virus M1 (1:500; Abcam, 20910); mouse polyclonal against virus M2  
654 (1:500; Abcam, 5416). The secondary antibodies used were from IRDye range (1:10000; LI-  
655 COR Biosciences).

656

657 **Enzyme-linked immunosorbent assay.** Detection of IFN- $\beta$  in the cell supernatants was done  
658 using the Verikine<sup>TM</sup> Human IFN Beta ELISA kit (PBL Assay Science, 41410), range 50-4000  
659 pg/mL, following the manufacturer's instructions.

660

661 **Quantitative real-time reverse-transcription PCR (RT-qPCR).** Extraction of RNA from  
662 samples in NZYol (NZYtech, MB18501) was achieved by using the Direct-zol RNA minipreps  
663 (Zymo Research, R2052). Reverse transcription (RT) was performed using the transcriptor first  
664 strand cDNA kit (Roche, 04896866001). Real-time RT-PCR to detect GAPDH and IFN-  $\beta$ , IFN-  
665  $\alpha$ , IL-29 and Viperin was prepared in 384-well, white, thin walled plates (Biorad, HSP3805) by  
666 using SYBR Green Supermix (Biorad, 172-5124), 10% (v/v) of cDNA and 0.4  $\mu$ M of each



667 primer. The reaction was performed on a CFX 384 Touch Real-Time PCR Detection System  
668 machine (Biorad), under the following PCR conditions: Cycle 1 (1 repeat): 95°C for 2 min; Cycle  
669 2 (40 repeats): 95°C for 5 s and 60°C for 30 s; Cycle 3: 95°C for 5 s and melt curve 65°C to  
670 95°C (increment 0.05°C each 5 s). Data were analysed using the CFX manager software  
671 (Biorad).

672 Primer sequenced used for real-time RT-qPCR were the following:

673 GAPDH Fw: 5'-CTCTGCTCCTCCTGTTTCGAC-3';

674 GAPDH Rv: 5'-ACCAAATCCGTTGACTCCGAC-3';

675 IL-29 Fw: 5'-AATTGGGACCTGAGGCTTCT-3';

676 IL-29 Rv: 5'-GTGAAGGGGCTGGTCTAGGA-3';

677 IFN- $\beta$  Fw: 5'-CCTGAAGGCCAAGGAGTACA-3';

678 IFN- $\beta$  Rv: 5'-AAGCAATTGTCCAGTCCCAG-3'

679 IFN- $\alpha$  Fw: 5'-ATGGCCCTGTCCTTTTCTTT-3'

680 IFN- $\alpha$  Rv: 5'-ATTCTTCCCATTGTGCCAG-3'

681 Viperin Fw: 5'-TCACTCGCCAGTGCAACTAC-3'

682 Viperin Rv: 5'-TGGCTCTCCACCTGAAAAGT-3'

683

## 684 **ACKNOWLEDGEMENTS**

685 This project, ALS and FF are supported by Fundação Calouste Gulbenkian-Instituto Gulbenkian  
686 de Ciência, Portugal. All other authors are supported by Fundação para a Ciência e a  
687 Tecnologia, Portugal: SVC and MA are funded by post-doctoral fellowships:  
688 SFRH/BPD/94204/2013 and SFRH/BPD/62982/2009, respectively; TAE is supported by the  
689 PhD fellowship PD/BD/128436/2017 and MJA is funded by the FCT investigator contract  
690 IF/00899/2013. The authors acknowledge Prof Paul Digard (Roslin Institute, UK) for providing  
691 reagents (antibodies, cell lines, viral strains and plasmids), Dr Ron Fouchier (Erasmus,

692 Netherlands) for the reverse genetics plasmids, Dr Colin Adrain (IGC, Portugal) for Sec23  
693 plasmid, and Dr Christoph Dehio for Sec61 $\beta$ -Emerald cell line (University of Basel, Switzerland).  
694 The authors thank Dr Fabrice Cordelières from the Bordeaux Imaging Center (INSERM,  
695 France), Gabriel Martins (IGC, Portugal), Nuno Pimpão (IGC, Portugal) and Dr Luís Moita (IGC,  
696 Portugal) for helpful discussion.

697

## 698 AUTHOR CONTRIBUTIONS

699 MJA, MA, SVC designed the experiments; all authors carried out experiments and analyzed the  
700 data; MJA supervised the research and conceived the experiments; MJA, MA and SVC wrote  
701 the manuscript; all authors contributed to editing the manuscript.

702

## 703 COMPETING INTERESTS

704 The authors declare no competing interests

705

## 706 REFERENCES

- 707 1 Kumar, B. *et al.* The emerging influenza virus threat: status and new prospects for its therapy and control. *Arch*  
708 *Viro* **163**, 831-844, doi:10.1007/s00705-018-3708-y (2018).  
709 2 Lee, N. *et al.* Genome-wide analysis of influenza viral RNA and nucleoprotein association. *Nucleic Acids Res* **45**,  
710 8968-8977, doi:10.1093/nar/gkx584 (2017).  
711 3 Lowen, A. C. Constraints, Drivers, and Implications of Influenza A Virus Reassortment. *Annu Rev Virol* **4**, 105-121,  
712 doi:10.1146/annurev-virology-101416-041726 (2017).  
713 4 Belshaw, R., Gardner, A., Rambaut, A. & Pybus, O. G. Pacing a small cage: mutation and RNA viruses. *Trends*  
714 *Ecol Evol* **23**, 188-193, doi:10.1016/j.tree.2007.11.010 (2008).  
715 5 Ferhadian, D. *et al.* Structural and Functional Motifs in Influenza Virus RNAs. *Front Microbiol* **9**, 559,  
716 doi:10.3389/fmicb.2018.00559 (2018).  
717 6 Giese, S., Bolte, H. & Schwemmle, M. The Feat of Packaging Eight Unique Genome Segments. *Viruses* **8**,  
718 doi:10.3390/v8060165 (2016).  
719 7 Fournier, E. *et al.* Interaction network linking the human H3N2 influenza A virus genomic RNA segments. *Vaccine*  
720 **30**, 7359-7367, doi:10.1016/j.vaccine.2012.09.079 (2012).  
721 8 Gavazzi, C. *et al.* An in vitro network of intermolecular interactions between viral RNA segments of an avian H5N2  
722 influenza A virus: comparison with a human H3N2 virus. *Nucleic Acids Res* **41**, 1241-1254,  
723 doi:10.1093/nar/gks1181 (2013).  
724 9 Nakatsu, S. *et al.* Complete and Incomplete Genome Packaging of Influenza A and B Viruses. *MBio* **7**,  
725 doi:10.1128/mBio.01248-16 (2016).  
726 10 Amorim, M. J. *et al.* A Rab11- and microtubule-dependent mechanism for cytoplasmic transport of influenza A  
727 virus viral RNA. *J Virol* **85**, 4143-4156, doi:JV1.02606-10 [pii] 10.1128/JVI.02606-10 (2011).  
728 11 Chou, Y. Y. *et al.* Colocalization of different influenza viral RNA segments in the cytoplasm before viral budding as  
729 shown by single-molecule sensitivity FISH analysis. *PLoS Pathog* **9**, e1003358, doi:10.1371/journal.ppat.1003358  
730 (2013).  
731 12 Eisfeld, A. J., Kawakami, E., Watanabe, T., Neumann, G. & Kawaoka, Y. RAB11A is essential for transport of the  
732 influenza virus genome to the plasma membrane. *J Virol* **85**, 6117-6126, doi:JV1.00378-11 [pii] 10.1128/JVI.00378-  
733 11 (2011).

- 734 13 Lakdawala, S. S. *et al.* Influenza a virus assembly intermediates fuse in the cytoplasm. *PLoS Pathog* **10**,  
735 e1003971, doi:10.1371/journal.ppat.1003971  
736 PPATHOGENS-D-13-02311 [pii] (2014).
- 737 14 Vale-Costa, S. *et al.* Influenza A virus ribonucleoproteins modulate host recycling by competing with Rab11  
738 effectors. *J Cell Sci* **129**, 1697-1710, doi:10.1242/jcs.188409 (2016).
- 739 15 Vale-Costa, S. & Amorim, M. J. Clustering of Rab11 vesicles in influenza A virus infected cells creates hotspots  
740 containing the eight viral ribonucleoproteins. *Small GTPases*, 0, doi:10.1080/21541248.2016.1199190 (2016).
- 741 16 de Castro Martin, I. F. *et al.* Influenza virus genome reaches the plasma membrane via a modified endoplasmic  
742 reticulum and Rab11-dependent vesicles. *Nat Commun* **8**, 1396, doi:10.1038/s41467-017-01557-6 (2017).
- 743 17 Momose, F. *et al.* Apical Transport of Influenza A Virus Ribonucleoprotein Requires Rab11-positive Recycling  
744 Endosome. *PLoS One* **6**, e21123, doi:PONE-D-11-05025 [pii] 10.1371/journal.pone.0021123 (2011).
- 745 18 Vale-Costa, S. & Amorim, M. J. Recycling Endosomes and Viral Infection. *Viruses* **8**, doi:10.3390/v8030064  
746 (2016).
- 747 19 Avilov, S. V. *et al.* Replication-competent influenza A virus that encodes a split-green fluorescent protein-tagged  
748 PB2 polymerase subunit allows live-cell imaging of the virus life cycle. *J Virol* **86**, 1433-1448,  
749 doi:10.1128/JVI.05820-11 (2012).
- 750 20 Hutchinson, E. C. *et al.* Conserved and host-specific features of influenza virion architecture. *Nat Commun* **5**,  
751 4816, doi:10.1038/ncomms5816 (2014).
- 752 21 Kawaguchi, A., Hirohama, M., Harada, Y., Osari, S. & Nagata, K. Influenza Virus Induces Cholesterol-Enriched  
753 Endocytic Recycling Compartments for Budozone Formation via Cell Cycle-Independent Centrosome Maturation.  
754 *PLoS Pathog* **11**, e1005284, doi:10.1371/journal.ppat.1005284 (2015).
- 755 22 Hutchinson, E. C. & Fodor, E. Transport of the influenza virus genome from nucleus to nucleus. *Viruses* **5**, 2424-  
756 2446, doi:10.3390/v5102424 (2013).
- 757 23 Lakdawala, S. S., Fodor, E. & Subbarao, K. Moving On Out: Transport and Packaging of Influenza Viral RNA into  
758 Virions. *Annu Rev Virol* **3**, 411-427, doi:10.1146/annurev-virology-110615-042345 (2016).
- 759 24 Netherton, C., Moffat, K., Brooks, E. & Wileman, T. A guide to viral inclusions, membrane rearrangements,  
760 factories, and viroplasm produced during virus replication. *Adv Virus Res* **70**, 101-182, doi:10.1016/S0065-  
761 3527(07)70004-0 (2007).
- 762 25 Netherton, C. L. & Wileman, T. Virus factories, double membrane vesicles and viroplasm generated in animal cells.  
763 *Curr Opin Virol* **1**, 381-387, doi:10.1016/j.coviro.2011.09.008 (2011).
- 764 26 Wileman, T. Aggresomes and pericentriolar sites of virus assembly: cellular defense or viral design? *Annu Rev*  
765 *Microbiol* **61**, 149-167, doi:10.1146/annurev.micro.57.030502.090836 (2007).
- 766 27 Nikolic, J. *et al.* Negri bodies are viral factories with properties of liquid organelles. *Nat Commun* **8**, 58,  
767 doi:10.1038/s41467-017-00102-9 (2017).
- 768 28 Rhim, J. S., Jordan, L. E. & Mayor, H. D. Cytochemical, fluorescent-antibody and electron microscopic studies on  
769 the growth of reovirus (ECHO 10) in tissue culture. *Virology* **17**, 342-355 (1962).
- 770 29 Morgan, C., Ellison, S. A., Rose, H. M. & Moore, D. H. Structure and development of viruses observed in the  
771 electron microscope. II. Vaccinia and fowl pox viruses. *J Exp Med* **100**, 301-310 (1954).
- 772 30 Amorim, M. J., Kao, R. Y. & Digard, P. Nucleozin targets cytoplasmic trafficking of viral ribonucleoprotein-rab11  
773 complexes in influenza a virus infection. *J Virol* **87**, 4694-4703, doi:10.1128/JVI.03123-12 (2013).
- 774 31 Nott, T. J. *et al.* Phase transition of a disordered nuage protein generates environmentally responsive  
775 membraneless organelles. *Mol Cell* **57**, 936-947, doi:10.1016/j.molcel.2015.01.013 (2015).
- 776 32 Hyman, A. A., Weber, C. A. & Julicher, F. Liquid-liquid phase separation in biology. *Annu Rev Cell Dev Biol* **30**, 39-  
777 58, doi:10.1146/annurev-cellbio-100913-013325 (2014).
- 778 33 Feric, M. *et al.* Coexisting Liquid Phases Underlie Nucleolar Subcompartments. *Cell* **165**, 1686-1697,  
779 doi:10.1016/j.cell.2016.04.047 (2016).
- 780 34 Woodruff, J. B. *et al.* The Centrosome Is a Selective Condensate that Nucleates Microtubules by Concentrating  
781 Tubulin. *Cell* **169**, 1066-1077 e1010, doi:10.1016/j.cell.2017.05.028 (2017).
- 782 35 Brangwynne, C. P. *et al.* Germline P granules are liquid droplets that localize by controlled  
783 dissolution/condensation. *Science* **324**, 1729-1732, doi:10.1126/science.1172046 (2009).
- 784 36 Molliex, A. *et al.* Phase separation by low complexity domains promotes stress granule assembly and drives  
785 pathological fibrillization. *Cell* **163**, 123-133, doi:10.1016/j.cell.2015.09.015 (2015).
- 786 37 Essere, B. *et al.* Critical role of segment-specific packaging signals in genetic reassortment of influenza A viruses.  
787 *Proc Natl Acad Sci U S A* **110**, E3840-3848, doi:10.1073/pnas.1308649110 (2013).
- 788 38 Gavazzi, C. *et al.* A functional sequence-specific interaction between influenza A virus genomic RNA segments.  
789 *Proc Natl Acad Sci U S A* **110**, 16604-16609, doi:10.1073/pnas.1314419110 (2013).
- 790 39 Venev, S. V. & Zeldovich, K. B. Segment self-repulsion is the major driving force of influenza genome packaging.  
791 *Phys Rev Lett* **110**, 098104, doi:10.1103/PhysRevLett.110.098104 (2013).
- 792 40 Duhaut, S. D. & McCauley, J. W. Defective RNAs inhibit the assembly of influenza virus genome segments in a  
793 segment-specific manner. *Virology* **216**, 326-337, doi:10.1006/viro.1996.0068 (1996).
- 794 41 Inagaki, A., Goto, H., Kakugawa, S., Ozawa, M. & Kawaoka, Y. Competitive incorporation of homologous gene  
795 segments of influenza A virus into virions. *J Virol* **86**, 10200-10202, doi:10.1128/JVI.01204-12 (2012).
- 796 42 Wu, X. *et al.* Evasion of antiviral immunity through sequestering of TBK1/IKKepsilon/IRF3 into viral inclusion  
797 bodies. *J Virol* **88**, 3067-3076, doi:10.1128/JVI.03510-13 (2014).

- 798 43 Nikolic, J., Civas, A., Lama, Z., Lagaudriere-Gesbert, C. & Blondel, D. Rabies Virus Infection Induces the  
799 Formation of Stress Granules Closely Connected to the Viral Factories. *PLoS Pathog* **12**, e1005942,  
800 doi:10.1371/journal.ppat.1005942 (2016).
- 801 44 Pereira, C. F., Read, E. K. C., Wise, H. M., Amorim, M. J. & Digard, P. Influenza A Virus NS1 Protein Promotes  
802 Efficient Nuclear Export of Unspliced Viral M1 mRNA. *J Virol* **91**, doi:10.1128/JVI.00528-17 (2017).
- 803 45 Bruce, E. A., Digard, P. & Stuart, A. D. The Rab11 pathway is required for influenza A virus budding and filament  
804 formation. *J Virol* **84**, 5848-5859, doi:10.1128/JVI.00307-10 (2010).
- 805 46 Garcia-Sastre, A. *et al.* Influenza A virus lacking the NS1 gene replicates in interferon-deficient systems. *Virology*  
806 **252**, 324-330 (1998).
- 807 47 Nixon-Abell, J. *et al.* Increased spatiotemporal resolution reveals highly dynamic dense tubular matrices in the  
808 peripheral ER. *Science* **354**, doi:10.1126/science.aaf3928 (2016).
- 809 48 Budnik, A. & Stephens, D. J. ER exit sites--localization and control of COPII vesicle formation. *FEBS letters* **583**,  
810 3796-3803, doi:10.1016/j.febslet.2009.10.038 (2009).
- 811 49 Chen, S. *et al.* Lunapark stabilizes nascent three-way junctions in the endoplasmic reticulum. *Proc Natl Acad Sci U*  
812 *S A* **112**, 418-423, doi:10.1073/pnas.1423026112 (2015).
- 813 50 Barlowe, C. & Helenius, A. Cargo Capture and Bulk Flow in the Early Secretory Pathway. *Annu Rev Cell Dev Biol*  
814 **32**, 197-222, doi:10.1146/annurev-cellbio-111315-125016 (2016).
- 815 51 Matsuoka, K. *et al.* COPII-coated vesicle formation reconstituted with purified coat proteins and chemically defined  
816 liposomes. *Cell* **93**, 263-275 (1998).
- 817 52 Aridor, M. *et al.* The Sar1 GTPase coordinates biosynthetic cargo selection with endoplasmic reticulum export site  
818 assembly. *The Journal of cell biology* **152**, 213-229 (2001).
- 819 53 Tse, Y. C., Lam, S. K. & Jiang, L. Enigmatic brefeldin a. *Plant Signal Behav* **2**, 199-202 (2007).
- 820 54 Wagner, M., Rajasekaran, A. K., Hanzel, D. K., Mayor, S. & Rodriguez-Boulan, E. Brefeldin A causes structural  
821 and functional alterations of the trans-Golgi network of MDCK cells. *J Cell Sci* **107 ( Pt 4)**, 933-943 (1994).
- 822 55 Banani, S. F., Lee, H. O., Hyman, A. A. & Rosen, M. K. Biomolecular condensates: organizers of cellular  
823 biochemistry. *Nat Rev Mol Cell Biol* **18**, 285-298, doi:10.1038/nrm.2017.7 (2017).
- 824 56 Altmeyer, M. *et al.* Liquid demixing of intrinsically disordered proteins is seeded by poly(ADP-ribose). *Nat Commun*  
825 **6**, 8088, doi:10.1038/ncomms9088 (2015).
- 826 57 Jin, M. *et al.* Glycolytic Enzymes Coalesce in G Bodies under Hypoxic Stress. *Cell Rep* **20**, 895-908,  
827 doi:10.1016/j.celrep.2017.06.082 (2017).
- 828 58 Wheeler, J. R., Matheny, T., Jain, S., Abrisch, R. & Parker, R. Distinct stages in stress granule assembly and  
829 disassembly. *Elife* **5**, doi:10.7554/eLife.18413 (2016).
- 830 59 Boke, E. *et al.* Amyloid-like Self-Assembly of a Cellular Compartment. *Cell* **166**, 637-650,  
831 doi:10.1016/j.cell.2016.06.051 (2016).
- 832 60 Li, P. *et al.* Phase transitions in the assembly of multivalent signalling proteins. *Nature* **483**, 336-340,  
833 doi:10.1038/nature10879 (2012).
- 834 61 Kelly, E. E., Horgan, C. P. & McCaffrey, M. W. Rab11 proteins in health and disease. *Biochemical Society*  
835 *transactions* **40**, 1360-1367, doi:10.1042/BST20120157 (2012).
- 836 62 Kakisaka, M., Yamada, K., Yamaji-Hasegawa, A., Kobayashi, T. & Aida, Y. Intrinsically disordered region of  
837 influenza A NP regulates viral genome packaging via interactions with viral RNA and host PI(4,5)P2. *Virology* **496**,  
838 116-126, doi:10.1016/j.virol.2016.05.018 (2016).
- 839 63 Alberti, S. Phase separation in biology. *Curr Biol* **27**, R1097-R1102, doi:10.1016/j.cub.2017.08.069 (2017).
- 840 64 Elton, D., Medcalf, E., Bishop, K. & Digard, P. Oligomerization of the influenza virus nucleoprotein: identification of  
841 positive and negative sequence elements. *Virology* **260**, 190-200, doi:10.1006/viro.1999.9818 (1999).
- 842 65 Ramos-Nascimento, A. *et al.* KIF13A mediates trafficking of influenza A virus ribonucleoproteins. *J Cell Sci* **130**,  
843 4038-4050, doi:10.1242/jcs.210807 (2017).
- 844 66 Nturibi, E., Bhagwat, A. R., Coburn, S., Myerburg, M. M. & Lakdawala, S. S. Intracellular Colocalization of  
845 Influenza Viral RNA and Rab11A Is Dependent upon Microtubule Filaments. *J Virol* **91**, doi:10.1128/JVI.01179-17  
846 (2017).
- 847 67 Boeynaems, S. *et al.* Phase Separation of C9orf72 Dipeptide Repeats Perturbs Stress Granule Dynamics. *Mol Cell*  
848 **65**, 1044-1055 e1045, doi:10.1016/j.molcel.2017.02.013 (2017).
- 849 68 Banerjee, P. R., Milin, A. N., Moosa, M. M., Onuchic, P. L. & Deniz, A. A. Reentrant Phase Transition Drives  
850 Dynamic Substructure Formation in Ribonucleoprotein Droplets. *Angew Chem Int Ed Engl* **56**, 11354-11359,  
851 doi:10.1002/anie.201703191 (2017).
- 852 69 Maharana, S. *et al.* RNA buffers the phase separation behavior of prion-like RNA binding proteins. *Science* **360**,  
853 918-921, doi:10.1126/science.aar7366 (2018).
- 854 70 Su, X. *et al.* Phase separation of signaling molecules promotes T cell receptor signal transduction. *Science* **352**,  
855 595-599, doi:10.1126/science.aad9964 (2016).
- 856 71 Delarue, M. *et al.* mTORC1 Controls Phase Separation and the Biophysical Properties of the Cytoplasm by Tuning  
857 Crowding. *Cell* **174**, 338-349 e320, doi:10.1016/j.cell.2018.05.042 (2018).
- 858 72 Sedzicki, J. *et al.* 3D correlative electron microscopy reveals continuity of Brucella-containing vacuoles with the  
859 endoplasmic reticulum. *J Cell Sci* **131**, doi:10.1242/jcs.210799 (2018).
- 860 73 Phair, R. D., Gorski, S. A. & Misteli, T. Measurement of dynamic protein binding to chromatin in vivo, using  
861 photobleaching microscopy. *Methods Enzymol* **375**, 393-414 (2004).
- 862
